# Supplementary material for: Pseudomonas aeruginosa Is More Tolerant Under Biofilm Than Under Planktonic Growth Conditions: A Multi-Isolate Survey
Source: PubMed Central journal article supplement (PMC8920030; doi:10.3389/fcimb.2022.851784), 2022-02-28
Supplement: DataSheet_1.pdf [file DataSheet_1.pdf]

## Supplementary Material

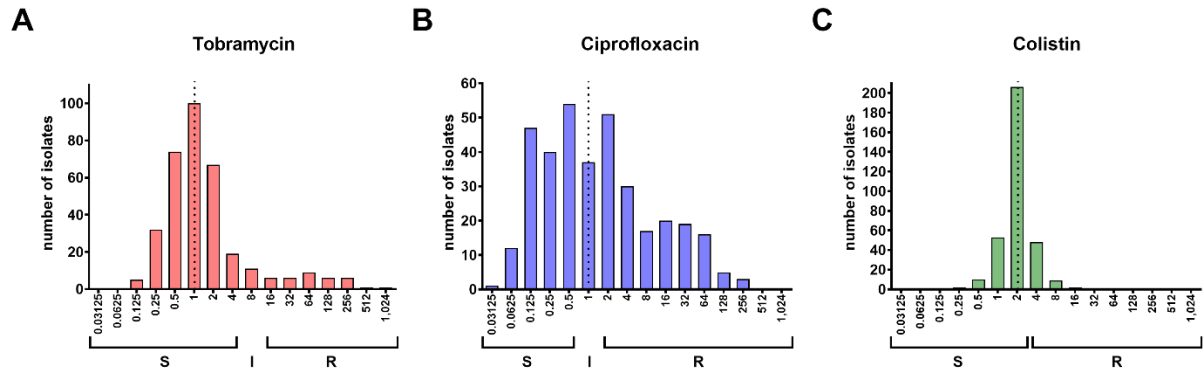

**Supplementary Figure 1: Distribution of minimal inhibitory concentrations (MIC) for clinical *P. aeruginosa* isolates.** Histograms of the MIC values of the 352 clinical isolates against tobramycin (A), ciprofloxacin (B), and colistin (C). S – susceptible; I – intermediate; R – resistant. Strains were categorized according to breakpoints defined by CLSI guidelines. Median MIC values are indicated by a dashed line.

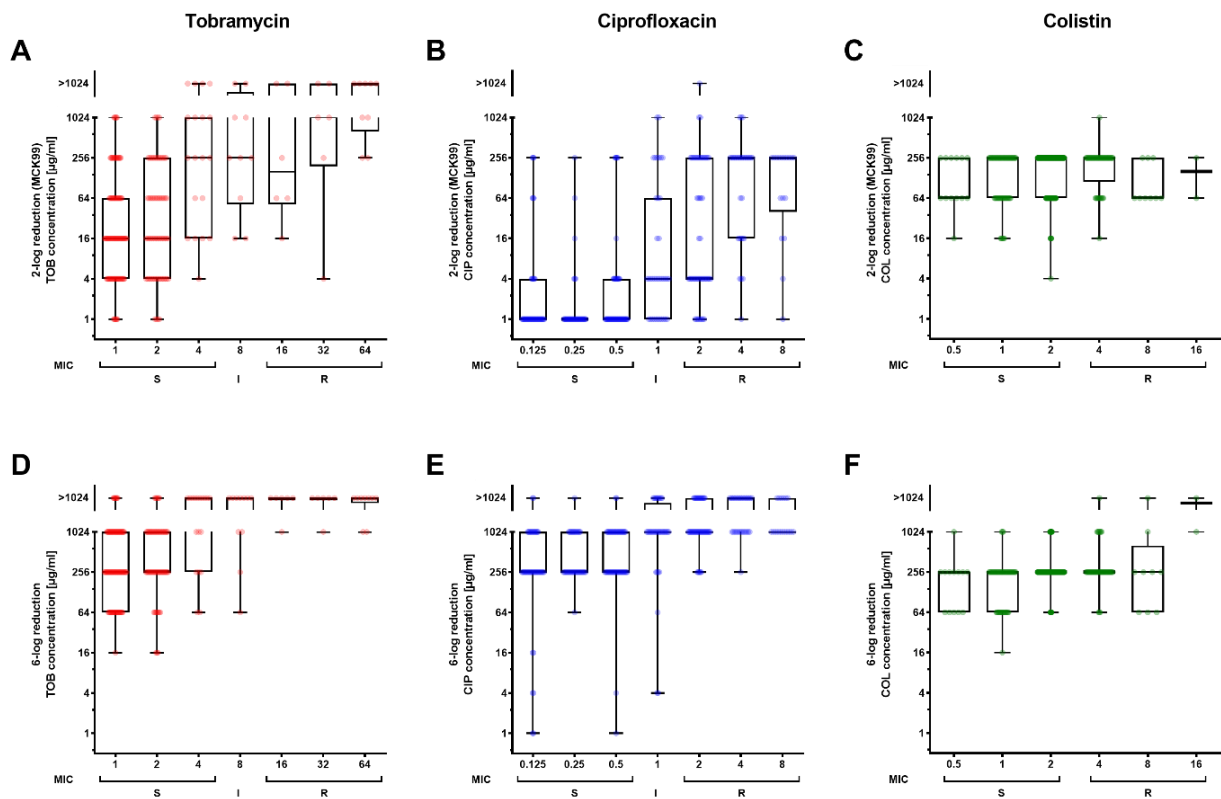

**Supplementary Figure 2: Concentration-dependent killing of biofilm-grown clinical *P. aeruginosa* isolate cells exhibiting different resistance levels.** Minimum concentrations of killing (MCK) for tobramycin (A, D), ciprofloxacin (B, E) and colistin (C, F) that are required to reduce biofilm-grown cells by 99 % (2-log reduction of CFU; MCK99; A-C) and those that are required to reduce biofilm-grown cells by 6-log (D-F) are depicted in box-plots. The clinical isolates were categorized into sub-groups exhibiting the same MIC values (x-axis). Boxplot elements are: center line – median; box limits – upper and lower quartiles; whiskers – minimum and maximum. Each dot represents one clinical isolate. S – susceptible; I – intermediate; R – resistant. Strains were categorized according to breakpoints defined by CLSI guidelines.

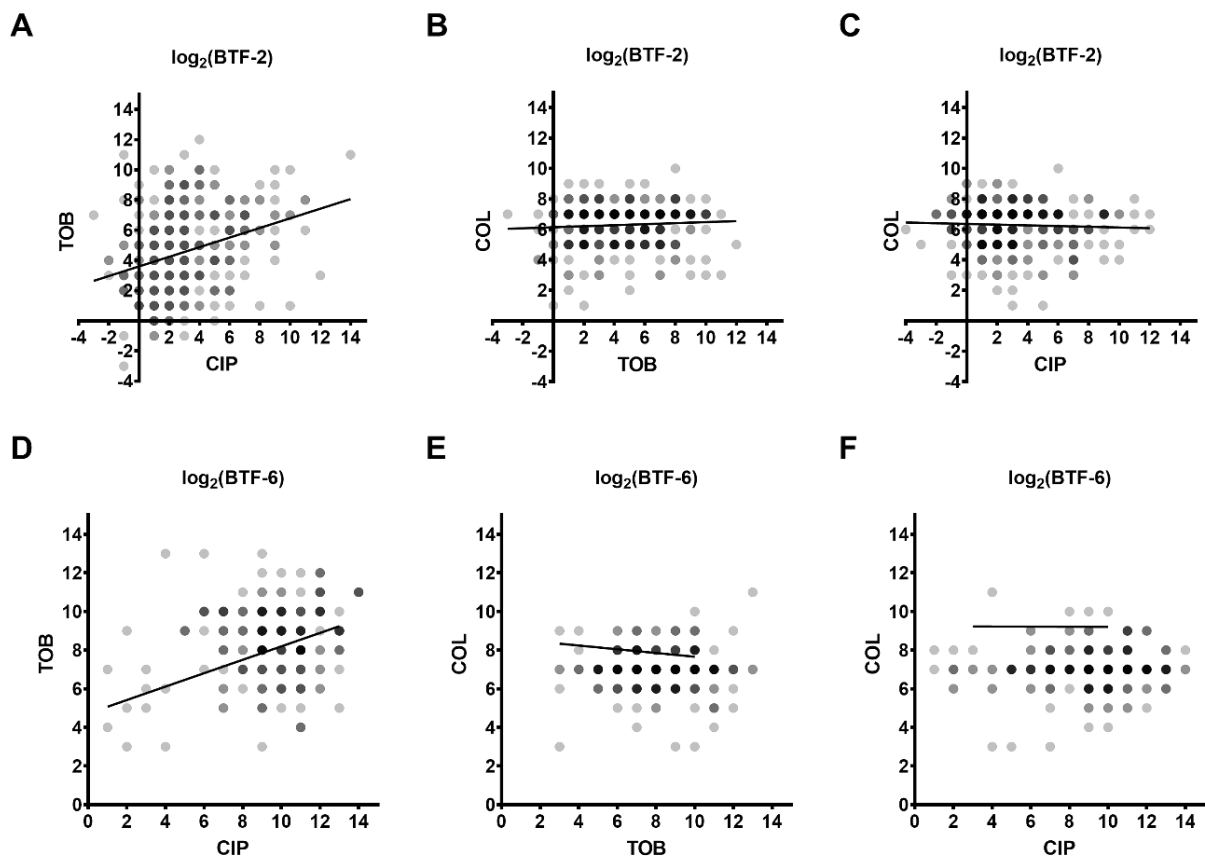

**Supplementary Figure 3: Cross-tolerance of biofilm-grown cells.** The dependence between the log<sub>2</sub>-transformed BTF-2 (**A-C**) and BTF-6 (**D-F**) of the three antibiotics on all clinical isolates is depicted. The correlation coefficient between the BTF-2 of tobramycin (TOB) and ciprofloxacin (CIP) was 0.3159 (**A**), and the correlation coefficient between the BTF-6 of tobramycin (TOB) and ciprofloxacin (CIP) was 0.1987 (**D**). No correlation was observed between the BTF-2 or the BTF-6 of colistin (COL) and TOB (**B, E**) or CIP (**C, D**). Dots represent the log<sub>2</sub>-transformed BTF-2 and BTF-6 respectively of the individual clinical isolates. Darker shades indicate overlapping datapoints.

**Supplementary Table 1: Antimicrobial susceptibility testing for 352 clinical *P. aeruginosa* isolates in planktonic and biofilm growth conditions.**

MIC – minimal inhibitory concentration; MCK – minimum antibiotic concentration of killing to achieve a certain reduction of biofilm colony-forming units (CFU); BTF – biofilm tolerance factor by which the MIC has to be multiplied to achieve a certain reduction of biofilm CFUs (BTF = MCK / MIC); min – lowest concentration/factor detected for at least one strain in the collection; max – highest concentration/factor detected; n(valid) – number of strains for which a conclusive test result was observed; n(n.d.) – number of strains for which the respective MCK and BTF respectively could not be exactly determined because the highest concentration tested (1,024 µg/ml) was not sufficient to result in the indicated reduction of biofilm CFU. S – susceptible; I – intermediate; R – resistant (according to CLSI guidelines). Concentrations are depicted in [µg/ml]. Concentrations ranging from 1 to 1,024 were used to test biofilm-induced tolerance.

|               |            | Minimal inhibitory concentration (MIC) | Minimum antibiotic concentration of killing (MCK) |                 |                   |                    |                     |                      |                      | Biofilm tolerance factor (BTF) |                 |                 |                 |                 |                 |                      |     |
|---------------|------------|----------------------------------------|---------------------------------------------------|-----------------|-------------------|--------------------|---------------------|----------------------|----------------------|--------------------------------|-----------------|-----------------|-----------------|-----------------|-----------------|----------------------|-----|
|               |            |                                        | MCK90<br>-1 log                                   | MCK99<br>-2 log | MCK99.9<br>-3 log | MCK99.99<br>-4 log | MCK99.999<br>-5 log | MCK99.9999<br>-6 log | MCK-E<br>eradication | BTF-1<br>-1 log                | BTF-2<br>-2 log | BTF-3<br>-3 log | BTF-4<br>-4 log | BTF-5<br>-5 log | BTF-6<br>-6 log | BTF-E<br>eradication |     |
| Tobramycin    | n(valid) = | 352                                    | 341                                               | 339             | 334               | 333                | 337                 | 338                  | 339                  | 341                            | 339             | 334             | 338             | 333             | 337             | 338                  | 339 |
|               | n(n.d.) =  | -                                      | 10 (2.9 %)                                        | 20 (5.9 %)      | 32 (9.6 %)        | 46 (13.8 %)        | 60 (17.8 %)         | 72 (21.3 %)          | 79 (23.3 %)          | 10 (2.9 %)                     | 20 (5.9 %)      | 32 (9.6 %)      | 46 (13.8 %)     | 60 (17.8 %)     | 72 (21.3 %)     | 79 (23.3 %)          |     |
|               | min        | 0.125                                  | 1                                                 | 1               | 1                 | 4                  | 4                   | 16                   | 16                   | 0.03125                        | 0.125           | 0.5             | 2               | 4               | 8               | 8                    |     |
|               | max        | 1,024                                  | >1,024                                            | >1,024          | >1,024            | >1,024             | >1,024              | >1,024               | >1,024               | 2,048                          | 4,096           | 4,096           | 8,192           | 8,192           | 8,192           | 8,192                |     |
|               | median     | 1                                      | 4                                                 | 16              | 128               | 256                | 256                 | 256                  | 256                  | 4                              | 16              | 64              | 256             | 256             | 256             | 256                  |     |
|               | S          | 303 (86 %)                             |                                                   |                 |                   |                    |                     |                      |                      |                                |                 |                 |                 |                 |                 |                      |     |
|               | I          | 14 (4 %)                               |                                                   |                 |                   |                    |                     |                      |                      |                                |                 |                 |                 |                 |                 |                      |     |
|               | R          | 35 (10 %)                              |                                                   |                 |                   |                    |                     |                      |                      |                                |                 |                 |                 |                 |                 |                      |     |
| Ciprofloxacin | n(valid) = | 352                                    | 352                                               | 350             | 347               | 347                | 349                 | 350                  | 351                  | 352                            | 350             | 347             | 347             | 349             | 350             | 351                  |     |
|               | n(n.d.) =  | -                                      | 0 (-)                                             | 2 (0.6 %)       | 10 (2.9 %)        | 22 (6.3 %)         | 44 (12.6 %)         | 84 (24 %)            | 101 (29 %)           | 0 (-)                          | 2 (0.6 %)       | 10 (2.9 %)      | 22 (6.3 %)      | 44 (12.6 %)     | 84 (24 %)       | 101 (29 %)           |     |
|               | min        | 0.03125                                | 1                                                 | 1               | 1                 | 1                  | 1                   | 1                    | 4                    | 0.015625                       | 0.0625          | 0.25            | 1               | 1               | 2               | 4                    |     |
|               | max        | 256                                    | 1,024                                             | >1,024          | >1,024            | >1,024             | >1,024              | >1,024               | >1,024               | 4,096                          | 16,384          | 16,384          | 16,384          | 16,384          | 16,384          | 16,384               |     |
|               | median     | 1                                      | 1                                                 | 4               | 256               | 256                | 1,024               | 1,024                | 1,024                | 2                              | 8               | 32              | 128             | 512             | 1,024           | 1,024                |     |
|               | S          | 154 (44 %)                             |                                                   |                 |                   |                    |                     |                      |                      |                                |                 |                 |                 |                 |                 |                      |     |
|               | I          | 37 (10 %)                              |                                                   |                 |                   |                    |                     |                      |                      |                                |                 |                 |                 |                 |                 |                      |     |
|               | R          | 161 (46 %)                             |                                                   |                 |                   |                    |                     |                      |                      |                                |                 |                 |                 |                 |                 |                      |     |
| Colistin      | n(valid) = | 352                                    | 337                                               | 337             | 337               | 337                | 333                 | 330                  | 330                  | 337                            | 337             | 337             | 337             | 333             | 330             | 330                  |     |
|               | n(n.d.) =  | -                                      | 0 (-)                                             | 1 (0.3 %)       | 2 (0.6 %)         | 2 (0.6 %)          | 2 (0.6 %)           | 4 (1.2 %)            | 4 (1.2 %)            | 0 (-)                          | 1 (0.3 %)       | 2 (0.6 %)       | 2 (0.6 %)       | 2 (0.6 %)       | 4 (1.2 %)       | 4 (1.2 %)            |     |
|               | min        | 0.25                                   | 1                                                 | 4               | 16                | 16                 | 16                  | 16                   | 64                   | 0.5                            | 2               | 8               | 8               | 8               | 8               | 8                    |     |
|               | max        | 32                                     | 256                                               | >1,024          | >1,024            | >1,024             | >1,024              | >1,024               | >1,024               | 1,024                          | 1,024           | 1,024           | 2,048           | 2,048           | 2,048           | 2,048                |     |
|               | median     | 2                                      | 64                                                | 256             | 256               | 256                | 256                 | 256                  | 256                  | 32                             | 128             | 128             | 128             | 128             | 128             | 128                  |     |
|               | S          | 287 (82 %)                             |                                                   |                 |                   |                    |                     |                      |                      |                                |                 |                 |                 |                 |                 |                      |     |
|               | R          | 65 (18 %)                              |                                                   |                 |                   |                    |                     |                      |                      |                                |                 |                 |                 |                 |                 |                      |     |
