# Supplementary material for: Pseudomonas aeruginosa Is More Tolerant Under Biofilm Than Under Planktonic Growth Conditions: A Multi-Isolate Survey
Source: Front Cell Infect Microbiol. 2022 Feb 28;12:851784. doi: 10.3389/fcimb.2022.851784 (PMC8920030; doi:10.3389/fcimb.2022.851784)
Supplement: Supplementary file 2 [file Table_1.xlsx]

## Sheet: clinical isolates
Isolate	Clinic / geographic origin	Sampling site	Background	Biofilm tolerance cluster		PSAExxxx strains were provided by a strain collection located at University hospital Freiburg
(Hornischer et al. 2019; Khaledi et al. 2020)	(Hornischer et al. 2019; Khaledi et al. 2020)	(Hornischer et al. 2019; Khaledi et al. 2020)	(Khaledi et al. 2020)	(This study)
CF577_Iso7	University hospital Essen	nd/other	#N/A	6
CF590_Iso5	University hospital Essen	nd/other	#N/A	2		References:
CF592_Iso2	University hospital Essen	respiratory tract, CF	PA14-like	1		Hornischer et al. 2019	https://doi.org/10.1093/nar/gky895
CF609_Iso3	University hospital Essen	respiratory tract, CF	PAO1-like	1		Khaledi et al. 2020	https://dx.doi.org/10.15252%2Femmm.201910264
CF609_Iso4	University hospital Essen	nd/other	#N/A	2
CF609_Iso5	University hospital Essen	nd/other	#N/A	3
CF610_Iso3	University hospital Essen	nd/other	#N/A	5
CH2500	Charité Berlin	respiratory tract	PA14-like	4
CH2502	Charité Berlin	nd/other	PAO1-like	1
CH2522	Charité Berlin	rectal/stool	PAO1-like	1
CH2527	Charité Berlin	nd/other	PAO1-like	5
CH2582	Charité Berlin	nd/other	PAO1-like	6
CH2597	Charité Berlin	wound	PAO1-like	4
CH2598	Charité Berlin	rectal/stool	PAO1-like	5
CH2658	Charité Berlin	urinary tract	PAO1-like	4
CH2660	Charité Berlin	respiratory tract	PAO1-like	3
CH2672	Charité Berlin	rectal/stool	PA14-like	4
CH2677	Charité Berlin	urinary tract	PA14-like	3
CH2678	Charité Berlin	respiratory tract, CF	PAO1-like	2
CH2680	Charité Berlin	nd/other	PAO1-like	5
CH2682	Charité Berlin	rectal/stool	PAO1-like	1
CH2685	Charité Berlin	rectal/stool	PA14-like	1
CH2687	Charité Berlin	urinary tract	PA14-like	4
CH2690	Charité Berlin	rectal/stool	PAO1-like	1
CH2698	Charité Berlin	respiratory tract	PAO1-like	2
CH2706	Charité Berlin	rectal/stool	PAO1-like	2
CH2707	Charité Berlin	urinary tract	PAO1-like	5
CH2713	Charité Berlin	respiratory tract	PA14-like	1
CH2718	Charité Berlin	wound	PAO1-like	1
CH2724	Charité Berlin	nd/other	PAO1-like	3
CH2730	Charité Berlin	rectal/stool	PA14-like	1
CH2734	Charité Berlin	respiratory tract	PA14-like	4
CH2735	Charité Berlin	respiratory tract	PAO1-like	4
CH2747	Charité Berlin	respiratory tract	PAO1-like	2
CH2756	Charité Berlin	respiratory tract	PAO1-like	1
CH2764	Charité Berlin	wound	PAO1-like	6
CH2824	Charité Berlin	respiratory tract	PA14-like	1
CH2829	Charité Berlin	rectal/stool	PA14-like	5
CH2848	Charité Berlin	rectal/stool	PAO1-like	1
CH2860	Charité Berlin	respiratory tract	PAO1-like	4
CH2875	Charité Berlin	nd/other	PAO1-like	2
CH2922	Charité Berlin	respiratory tract	PA14-like	1
CH2939	Charité Berlin	urinary tract	PAO1-like	5
CH3177	Charité Berlin	nd/other	PAO1-like	5
CH3290	Charité Berlin	respiratory tract	PA14-like	2
CH3325	Charité Berlin	wound	PAO1-like	5
CH3462	Charité Berlin	rectal/stool	PA14-like	3
CH3466	Charité Berlin	blood (sepsis)	PAO1-like	6
CH3484	Charité Berlin	blood (sepsis)	PAO1-like	3
CH3549	Charité Berlin	respiratory tract	PAO1-like	3
CH3797	Charité Berlin	rectal/stool	PA14-like	4
CH3882	Charité Berlin	urinary tract	PAO1-like	4
CH3906	Charité Berlin	respiratory tract	PAO1-like	1
CH4083	Charité Berlin	respiratory tract	PAO1-like	3
CH4418	Charité Berlin	rectal/stool	PA14-like	3
CH4438	Charité Berlin	nd/other	PAO1-like	4
CH4443	Charité Berlin	respiratory tract	PAO1-like	2
CH4446	Charité Berlin	wound	PAO1-like	4
CH4489	Charité Berlin	respiratory tract	PA14-like	3
CH4509	Charité Berlin	nd/other	PAO1-like	3
CH4520	Charité Berlin	respiratory tract	PAO1-like	3
CH4528	Charité Berlin	respiratory tract	PAO1-like	4
CH4549	Charité Berlin	rectal/stool	PAO1-like	3
CH4584	Charité Berlin	nd/other	PAO1-like	2
CH4591	Charité Berlin	rectal/stool	PAO1-like	4
CH4602	Charité Berlin	respiratory tract	PA14-like	3
CH4634	Charité Berlin	nd/other	PA14-like	4
CH4681	Charité Berlin	respiratory tract	PAO1-like	3
CH4684	Charité Berlin	respiratory tract	PAO1-like	1
CH4703	Charité Berlin	nd/other	PAO1-like	6
CH4704	Charité Berlin	respiratory tract	PAO1-like	5
CH4733	Charité Berlin	nd/other	PAO1-like	5
CH4755	Charité Berlin	wound	PAO1-like	4
CH4757	Charité Berlin	respiratory tract	PA14-like	1
CH4766	Charité Berlin	nd/other	PAO1-like	6
CH4780	Charité Berlin	respiratory tract	PAO1-like	4
CH4785	Charité Berlin	respiratory tract	PAO1-like	4
CH4786	Charité Berlin	nd/other	#N/A	2
CH4840	Charité Berlin	respiratory tract	PAO1-like	1
CH4860	Charité Berlin	respiratory tract	PAO1-like	2
CH4878	Charité Berlin	respiratory tract	PAO1-like	4
CH4891	Charité Berlin	rectal/stool	PAO1-like	1
CH4914	Charité Berlin	urinary tract	PAO1-like	4
CH4916	Charité Berlin	respiratory tract	PA14-like	3
CH4990	Charité Berlin	wound	PAO1-like	1
CH4992	Charité Berlin	respiratory tract	PAO1-like	4
CH5052	Charité Berlin	urinary tract	PA14-like	2
CH5066	Charité Berlin	rectal/stool	PAO1-like	3
CH5182	Charité Berlin	respiratory tract	PAO1-like	1
CH5206	Charité Berlin	rectal/stool	PAO1-like	6
CH5262	Charité Berlin	rectal/stool	PAO1-like	5
CH5267	Charité Berlin	rectal/stool	PA14-like	3
CH5291	Charité Berlin	rectal/stool	PAO1-like	3
CH5334	Charité Berlin	rectal/stool	PA14-like	4
CH5353	Charité Berlin	rectal/stool	PAO1-like	3
CH5362	Charité Berlin	respiratory tract	PAO1-like	4
CH5363	Charité Berlin	respiratory tract	PAO1-like	5
CH5387	Charité Berlin	respiratory tract	PAO1-like	5
CH5432	Charité Berlin	rectal/stool	PAO1-like	4
CH5462	Charité Berlin	rectal/stool	PA14-like	3
CH5478	Charité Berlin	nd/other	PAO1-like	5
CH5528	Charité Berlin	ear	PA14-like	3
CH5531	Charité Berlin	nd/other	PAO1-like	6
CH5548	Charité Berlin	respiratory tract	PAO1-like	2
CH5550	Charité Berlin	nd/other	PAO1-like	4
CH5591	Charité Berlin	rectal/stool	PA14-like	2
CH5596	Charité Berlin	rectal/stool	PA14-like	1
CH5597	Charité Berlin	rectal/stool	PAO1-like	5
CH5621	Charité Berlin	respiratory tract	PAO1-like	4
CH5638	Charité Berlin	rectal/stool	PAO1-like	4
ESP001	University hospital Palma de Mallorca, Spain	nd/other	#N/A	3
ESP002	University hospital Palma de Mallorca, Spain	nd/other, chronic	PA14-like	5
ESP003	University hospital Palma de Mallorca, Spain	nd/other, chronic	PA14-like	3
ESP004	University hospital Palma de Mallorca, Spain	nd/other, chronic	PA14-like	1
ESP006	University hospital Palma de Mallorca, Spain	nd/other, chronic	PAO1-like	6
ESP009	University hospital Palma de Mallorca, Spain	nd/other, chronic	PAO1-like	1
ESP011	University hospital Palma de Mallorca, Spain	nd/other, chronic	PAO1-like	4
ESP012	University hospital Palma de Mallorca, Spain	nd/other, chronic	PAO1-like	6
ESP013	University hospital Palma de Mallorca, Spain	nd/other, chronic	PAO1-like	3
ESP015	University hospital Palma de Mallorca, Spain	nd/other, chronic	PA14-like	1
ESP020	University hospital Palma de Mallorca, Spain	nd/other, chronic	PA14-like	3
ESP021	University hospital Palma de Mallorca, Spain	nd/other, chronic	PA14-like	1
ESP022	University hospital Palma de Mallorca, Spain	nd/other, chronic	PAO1-like	5
ESP023	University hospital Palma de Mallorca, Spain	nd/other, chronic	PAO1-like	2
ESP024	University hospital Palma de Mallorca, Spain	nd/other, chronic	PAO1-like	1
ESP025	University hospital Palma de Mallorca, Spain	nd/other, chronic	PAO1-like	6
ESP027	University hospital Palma de Mallorca, Spain	nd/other, chronic	PAO1-like	6
ESP028	University hospital Palma de Mallorca, Spain	nd/other, chronic	PA14-like	3
ESP029	University hospital Palma de Mallorca, Spain	nd/other, chronic	PAO1-like	5
ESP031	University hospital Palma de Mallorca, Spain	nd/other, chronic	PA14-like	3
ESP032	University hospital Palma de Mallorca, Spain	nd/other, chronic	PAO1-like	3
ESP033	University hospital Palma de Mallorca, Spain	nd/other, chronic	PA14-like	1
ESP034	University hospital Palma de Mallorca, Spain	nd/other, chronic	PAO1-like	3
ESP035	University hospital Palma de Mallorca, Spain	nd/other, chronic	PAO1-like	4
ESP036	University hospital Palma de Mallorca, Spain	nd/other, chronic	PAO1-like	1
ESP037	University hospital Palma de Mallorca, Spain	nd/other, chronic	PA14-like	2
ESP038	University hospital Palma de Mallorca, Spain	nd/other, chronic	PAO1-like	1
ESP039	University hospital Palma de Mallorca, Spain	nd/other, chronic	PAO1-like	6
ESP040	University hospital Palma de Mallorca, Spain	nd/other, chronic	PAO1-like	2
ESP044	University hospital Palma de Mallorca, Spain	nd/other, chronic	PAO1-like	5
ESP046	University hospital Palma de Mallorca, Spain	nd/other, chronic	PA14-like	5
ESP050	University hospital Palma de Mallorca, Spain	nd/other, chronic	PA14-like	4
ESP054	University hospital Palma de Mallorca, Spain	nd/other	#N/A	1
ESP055	University hospital Palma de Mallorca, Spain	nd/other, acute	PAO1-like	6
ESP057	University hospital Palma de Mallorca, Spain	nd/other, acute	PAO1-like	4
ESP058	University hospital Palma de Mallorca, Spain	nd/other, acute	PAO1-like	1
ESP059	University hospital Palma de Mallorca, Spain	nd/other, acute	PAO1-like	4
ESP060	University hospital Palma de Mallorca, Spain	nd/other, acute	PAO1-like	3
ESP063	University hospital Palma de Mallorca, Spain	nd/other, acute	PAO1-like	2
ESP066	University hospital Palma de Mallorca, Spain	nd/other, acute	PAO1-like	4
ESP067	University hospital Palma de Mallorca, Spain	nd/other, acute	PAO1-like	3
ESP070	University hospital Palma de Mallorca, Spain	nd/other, acute	PA14-like	4
ESP072	University hospital Palma de Mallorca, Spain	nd/other, acute	PAO1-like	5
ESP073	University hospital Palma de Mallorca, Spain	nd/other, acute	PAO1-like	2
ESP075	University hospital Palma de Mallorca, Spain	nd/other, acute	PA14-like	4
ESP076	University hospital Palma de Mallorca, Spain	nd/other, acute	PA14-like	3
ESP077	University hospital Palma de Mallorca, Spain	nd/other, acute	#N/A	1
ESP081	University hospital Palma de Mallorca, Spain	nd/other, acute	PAO1-like	1
ESP083	University hospital Palma de Mallorca, Spain	nd/other, acute	PAO1-like	2
ESP088	University hospital Palma de Mallorca, Spain	nd/other, acute	PAO1-like	2
ESP091	University hospital Palma de Mallorca, Spain	nd/other, acute	PA14-like	4
ESP093	University hospital Palma de Mallorca, Spain	nd/other	#N/A	2
F1659	University hospital Frankfurt	respiratory tract	PA14-like	4
F1688	University hospital Frankfurt	wound	PAO1-like	4
F1689	University hospital Frankfurt	rectal/stool	PAO1-like	2
F1706	University hospital Frankfurt	rectal/stool	PAO1-like	5
F1720	University hospital Frankfurt	nd/other	#N/A	3
F1727	University hospital Frankfurt	urinary tract	PAO1-like	3
F1748	University hospital Frankfurt	urinary tract	PAO1-like	2
F1757	University hospital Frankfurt	urinary tract	PAO1-like	3
F1758	University hospital Frankfurt	respiratory tract	PAO1-like	3
F1759	University hospital Frankfurt	rectal/stool	PAO1-like	2
F1764	University hospital Frankfurt	respiratory tract	PAO1-like	2
F1775	University hospital Frankfurt	wound	PAO1-like	4
F1800	University hospital Frankfurt	rectal/stool	PAO1-like	5
F1801	University hospital Frankfurt	wound	PA14-like	4
F1823	University hospital Frankfurt	wound	PAO1-like	3
F1856	University hospital Frankfurt	nd/other	#N/A	4
F1862	University hospital Frankfurt	respiratory tract	PA14-like	6
F1864	University hospital Frankfurt	nd/other	PA14-like	2
F1880	University hospital Frankfurt	respiratory tract	PAO1-like	6
F1883	University hospital Frankfurt	respiratory tract	PAO1-like	2
F1894	University hospital Frankfurt	respiratory tract	PAO1-like	4
F1957	University hospital Frankfurt	respiratory tract	PA14-like	4
F1959	University hospital Frankfurt	nd/other	#N/A	2
F1968	University hospital Frankfurt	wound	PAO1-like	4
F1997	University hospital Frankfurt	rectal/stool	PAO1-like	3
F2003	University hospital Frankfurt	skin	PA14-like	4
F2005	University hospital Frankfurt	wound	PAO1-like	4
F2006	University hospital Frankfurt	wound	PAO1-like	2
F2010	University hospital Frankfurt	rectal/stool	PAO1-like	4
F2017	University hospital Frankfurt	rectal/stool	PAO1-like	4
F2020	University hospital Frankfurt	wound	PA14-like	4
F2026	University hospital Frankfurt	nd/other	#N/A	3
F2029	University hospital Frankfurt	respiratory tract	PAO1-like	3
F2030	University hospital Frankfurt	respiratory tract	PA14-like	2
F2034	University hospital Frankfurt	rectal/stool	PAO1-like	4
F2035	University hospital Frankfurt	respiratory tract	PAO1-like	3
F2044	University hospital Frankfurt	respiratory tract	PA14-like	1
F2045	University hospital Frankfurt	respiratory tract	PA14-like	6
F2055	University hospital Frankfurt	urinary tract	PAO1-like	2
F2059	University hospital Frankfurt	wound	PAO1-like	2
F2065	University hospital Frankfurt	respiratory tract	PAO1-like	4
F2075	University hospital Frankfurt	wound	PAO1-like	6
F2081	University hospital Frankfurt	rectal/stool	PAO1-like	4
F2084	University hospital Frankfurt	respiratory tract	PAO1-like	3
F2093	University hospital Frankfurt	respiratory tract	PAO1-like	4
F2119	University hospital Frankfurt	wound	PAO1-like	2
F2128	University hospital Frankfurt	respiratory tract	PAO1-like	6
F2137	University hospital Frankfurt	wound	PAO1-like	2
F2148	University hospital Frankfurt	respiratory tract	PAO1-like	4
F2160	University hospital Frankfurt	nd/other	#N/A	1
F2165	University hospital Frankfurt	respiratory tract	PAO1-like	2
F2166	University hospital Frankfurt	respiratory tract	PAO1-like	2
F2172	University hospital Frankfurt	skin	PAO1-like	3
F2205	University hospital Frankfurt	wound	PAO1-like	3
F2224	University hospital Frankfurt	nd/other	#N/A	2
F2229	University hospital Frankfurt	nd/other	#N/A	4
F2230	University hospital Frankfurt	respiratory tract	PAO1-like	4
F2234	University hospital Frankfurt	blood (sepsis)	PAO1-like	4
F2235	University hospital Frankfurt	respiratory tract	PAO1-like	2
F2236	University hospital Frankfurt	respiratory tract	PAO1-like	1
F2394	University hospital Frankfurt	nd/other	#N/A	2
F2805	University hospital Frankfurt	nd/other	#N/A	2
F2856	University hospital Frankfurt	nd/other	#N/A	2
F2942	University hospital Frankfurt	nd/other	#N/A	2
M70563004	University hospital Münster	rectal/stool	PAO1-like	1
M70564993	University hospital Münster	respiratory tract	PA14-like	3
M70565254	University hospital Münster	respiratory tract	PAO1-like	1
M70565897	University hospital Münster	respiratory tract	PAO1-like	5
M70604538	University hospital Münster	respiratory tract	PAO1-like	2
M70608424	University hospital Münster	respiratory tract	PAO1-like	4
M70639645	University hospital Münster	urinary tract	PAO1-like	3
M70640096	University hospital Münster	wound	PAO1-like	5
M70641593	University hospital Münster	respiratory tract	PAO1-like	3
M70646050	University hospital Münster	wound	PAO1-like	1
M70646077	University hospital Münster	rectal/stool	PAO1-like	5
M70647319	University hospital Münster	respiratory tract	PAO1-like	5
M70649365	University hospital Münster	rectal/stool	PAO1-like	2
M70652746	University hospital Münster	rectal/stool	PAO1-like	3
M70656672	University hospital Münster	respiratory tract	PAO1-like	1
M70663247	University hospital Münster	urinary tract	PA14-like	1
MD10010	University hospital Magdeburg	nd/other	#N/A	6
MD1037	University hospital Magdeburg	urinary tract	#N/A	5
MD1496	University hospital Magdeburg	blood (sepsis)	#N/A	3
MD1498	University hospital Magdeburg	urinary tract	#N/A	2
MD3496	University hospital Magdeburg	nd/other	#N/A	3
MD4301	University hospital Magdeburg	nd/other	#N/A	3
MD6136	University hospital Magdeburg	nd/other	#N/A	3
MD6439	University hospital Magdeburg	nd/other	#N/A	5
MD8034	University hospital Magdeburg	nd/other	#N/A	1
MD8386	University hospital Magdeburg	nd/other	#N/A	3
MD8672	University hospital Magdeburg	nd/other	#N/A	1
MD9120	University hospital Magdeburg	nd/other	#N/A	1
MD9121	University hospital Magdeburg	nd/other	#N/A	1
MD9481	University hospital Magdeburg	nd/other	#N/A	2
MD9723	University hospital Magdeburg	nd/other	#N/A	5
MD9965_1	University hospital Magdeburg	nd/other	#N/A	1
MD9965_2	University hospital Magdeburg	nd/other	#N/A	1
MHH0147	Hannover Medical School	nd/other	PAO1-like	3
MHH0426	Hannover Medical School	nd/other	PAO1-like	3
MHH0927	Hannover Medical School	nd/other	PAO1-like	4
MHH0985	Hannover Medical School	nd/other	PAO1-like	6
MHH14911	Hannover Medical School	wound	PA14-like	3
MHH14929	Hannover Medical School	wound	PAO1-like	4
MHH14990	Hannover Medical School	wound	PAO1-like	3
MHH15015	Hannover Medical School	respiratory tract	PAO1-like	3
MHH15103	Hannover Medical School	wound	PA14-like	2
MHH15151	Hannover Medical School	respiratory tract	PAO1-like	1
MHH15187	Hannover Medical School	respiratory tract	PAO1-like	3
MHH15204	Hannover Medical School	respiratory tract, CF	PA14-like	3
MHH15275	Hannover Medical School	respiratory tract	PAO1-like	6
MHH15280	Hannover Medical School	rectal/stool	PAO1-like	3
MHH15286	Hannover Medical School	nd/other	#N/A	1
MHH15817	Hannover Medical School	blood (sepsis)	PAO1-like	4
MHH16050	Hannover Medical School	nd/other	PAO1-like	3
MHH16208	Hannover Medical School	wound	PAO1-like	1
MHH16371	Hannover Medical School	rectal/stool	PAO1-like	4
MHH16379	Hannover Medical School	respiratory tract	PAO1-like	6
MHH16427	Hannover Medical School	wound	PAO1-like	1
MHH16459	Hannover Medical School	respiratory tract	PAO1-like	3
MHH16513	Hannover Medical School	respiratory tract	PAO1-like	2
MHH16530	Hannover Medical School	respiratory tract, CF	PA14-like	3
MHH16563	Hannover Medical School	respiratory tract, CF	PA14-like	3
MHH16610	Hannover Medical School	respiratory tract	PAO1-like	6
MHH16727	Hannover Medical School	wound	PA14-like	5
MHH16798	Hannover Medical School	respiratory tract	PAO1-like	2
MHH16951	Hannover Medical School	respiratory tract, CF	PA14-like	2
MHH17247	Hannover Medical School	blood (sepsis)	PAO1-like	2
MHH17501	Hannover Medical School	respiratory tract	PAO1-like	4
MHH17546	Hannover Medical School	respiratory tract, CF	PAO1-like	2
MHH17634	Hannover Medical School	nd/other	#N/A	3
MHH17704	Hannover Medical School	nd/other	#N/A	1
MHH17767	Hannover Medical School	respiratory tract, CF	PAO1-like	6
MHH17783	Hannover Medical School	respiratory tract, CF	PAO1-like	6
MHH1883	Hannover Medical School	nd/other	PA14-like	5
MHH2419	Hannover Medical School	nd/other	PAO1-like	3
MS1	University hospital Münster	nd/other	PAO1-like	3
MS2	University hospital Münster	nd/other	PAO1-like	3
MS5	University hospital Münster	nd/other	PAO1-like	3
PSAE1401	Stuttgart	nd/other	PAO1-like	3
PSAE1438	Stuttgart	respiratory tract	PAO1-like	2
PSAE1439	Stuttgart	respiratory tract	PAO1-like	4
PSAE1630	Gera	urinary tract	PAO1-like	3
PSAE1635	Munich	respiratory tract	PA14-like	1
PSAE1641	Munich	respiratory tract	PA14-like	2
PSAE1642	Munich	respiratory tract	PA14-like	4
PSAE1645	Munich	respiratory tract	PA14-like	6
PSAE1647	Munich	nd/other	PA14-like	1
PSAE1649	Munich	wound	PA14-like	5
PSAE1651	Munich	nd/other	PA14-like	5
PSAE1654	Munich	respiratory tract	PA14-like	1
PSAE1656	Munich	respiratory tract	PA14-like	5
PSAE1742	Freiburg	respiratory tract	PAO1-like	2
PSAE1745	Munich	respiratory tract	PAO1-like	2
PSAE1837	Gera	nd/other	PA14-like	5
PSAE1872	Berlin	respiratory tract	PAO1-like	1
PSAE1903	Gera	urinary tract	PAO1-like	4
PSAE1934	Bremen	respiratory tract	PAO1-like	1
PSAE1970	Regensburg	respiratory tract	PAO1-like	2
PSAE1975	Regensburg	wound	PAO1-like	6
PSAE1984	Bremen	respiratory tract	PAO1-like	1
PSAE2125	Neubrandenburg	respiratory tract	PAO1-like	3
PSAE2126	Neubrandenburg	respiratory tract	PAO1-like	6
PSAE2325	Neubrandenburg	respiratory tract	PAO1-like	1
Vb3320	University hospital Essen	nd/other	PA14-like	1
ZG02488718	Radebeul	wound	PA14-like	3
ZG02512057	Radebeul	wound	PA14-like	5
ZG205565	Görlitz	nd/other	PAO1-like	6
ZG205694	Görlitz	urinary tract	PAO1-like	3
ZG205710	Görlitz	urinary tract	PAO1-like	4
ZG301975	Görlitz	nd/other	PA14-like	1
ZG302359	Görlitz	nd/other	PAO1-like	3
ZG302367	Görlitz	ear	PAO1-like	3
ZG302368	Görlitz	ear	PAO1-like	5
ZG302370	Görlitz	ear	PAO1-like	2
ZG302383	Görlitz	nd/other	PA14-like	5
ZG302431	Görlitz	ear	PAO1-like	6
ZG302432	Görlitz	ear	PAO1-like	1
ZG302442	Görlitz	ear	PA14-like	6
ZG302451	Görlitz	wound	PAO1-like	1
ZG314696	Görlitz	ear	PAO1-like	5
ZG314738	Görlitz	respiratory tract	PA14-like	5
ZG314777	Görlitz	ulcer	PAO1-like	1
ZG316694	Görlitz	wound	PAO1-like	1
ZG316704	Görlitz	nd/other	PA14-like	5
ZG316716	Görlitz	ear	PAO1-like	2
ZG316717	Görlitz	nd/other	#N/A	4
ZG316722	Görlitz	ulcer	PA14-like	5
ZG5003493	Leipzig	respiratory tract, CF	PAO1-like	1
ZG8038581181	Chemnitz	respiratory tract	PAO1-like	4
ZG8510487	Leipzig	urinary tract	PAO1-like	2

## Sheet: TOB
	Tobramycin		Minimum antibiotic concentration of killing (MCK)							Biofilm tolerance factor (BTF)
			MCK90	MCK99	MCK99.9	MCK99.99	MCK99.999	MCK99.9999	MCK-E	BTF-1	BTF-2	BTF-3	BTF-4	BTF-5	BTF-6	BTF-E
isolate	MIC	CLSI	-1 log	-2 log	-3 log	-4 log	-5 log	-6 log	eradication	-1 log	-2 log	-3 log	-4 log	-5 log	-6 log	eradication
CF577_Iso7	32	R	1024	1024	>1024	>1024	>1024	>1024	>1024	32	32	>32	>32	>32	>32	>32
CF590_Iso5	16	R	4	16	1024	>1024	>1024	>1024	>1024	0.25	1	64	>64	>64	>64	>64
CF592_Iso2	2	S	4	4	64	64	64	256	256	2	2	32	32	32	128	128
CF609_Iso3	8	I	64	256	256	256	256	256	256	8	32	32	32	32	32	32
CF609_Iso4	8	I	256	1024	1024	>1024	>1024	>1024	>1024	32	128	128	>128	>128	>128	>128
CH2500	0.5	S	4	64	64	256	256	256	1024	8	128	128	512	512	512	2048
CH2502	4	S	4	16	16	64	64	64	256	1	4	4	16	16	16	64
CH2522	2	S	16	16	64	1024	1024	1024	1024	8	8	32	512	512	512	512
CH2527	0.5	S	64	64	256	256	1024	1024	1024	128	128	512	512	2048	2048	2048
CH2582	0.5	S	1	4	16	64	64	64	64	2	8	32	128	128	128	128
CH2597	1	S	256	256	256	256	256	256	256	256	256	256	256	256	256	256
CH2598	1	S	4	16	64	256	256	256	256	4	16	64	256	256	256	256
CH2658	1	S	4	16	16	64	64	64	256	4	16	16	64	64	64	256
CH2660	0.25	S	4	64	64	64	64	256	256	16	256	256	256	256	1024	1024
CH2672	0.125	S	16	64	256	256	1024	1024	>1024	128	512	2048	2048	8192	8192	>8192
CH2677	0.25	S	256	1024	1024	1024	1024	>1024	>1024	1024	4096	4096	4096	4096	>4096	>4096
CH2678	4	S	>1024	>1024	>1024	>1024	>1024	>1024	>1024	>256	>256	>256	>256	>256	>256	>256
CH2682	2	S	16	64	256	1024	1024	1024	1024	8	32	128	512	512	512	512
CH2685	2	S	4	16	64	64	64	256	256	2	8	32	32	32	128	128
CH2687	1	S	4	16	#N/A	#N/A	1024	1024	1024	4	16	#N/A	#N/A	1024	1024	1024
CH2690	2	S	16	16	64	256	256	256	256	8	8	32	128	128	128	128
CH2698	64	R	256	256	1024	1024	1024	1024	>1024	4	4	16	16	16	16	>16
CH2706	256	R	64	1024	1024	>1024	>1024	>1024	>1024	0.25	4	4	>4	>4	>4	>4
CH2707	512	R	>1024	>1024	>1024	>1024	>1024	>1024	>1024	>2	>2	>2	>2	>2	>2	>2
CH2713	1	S	1	1	16	16	64	64	256	1	1	16	16	64	64	256
CH2718	1	S	1	1	4	16	64	64	64	1	1	4	16	64	64	64
CH2724	2	S	1	256	1024	1024	1024	1024	1024	0.5	128	512	512	512	512	512
CH2730	0.25	S	4	4	16	16	64	64	64	16	16	64	64	256	256	256
CH2734	2	S	1	64	256	256	256	256	256	0.5	32	128	128	128	128	128
CH2735	0.25	S	1	4	4	256	256	256	256	4	16	16	1024	1024	1024	1024
CH2747	0.5	S	1	1	16	16	16	64	64	2	2	32	32	32	128	128
CH2756	2	S	1	64	64	64	256	256	256	0.5	32	32	32	128	128	128
CH2764	2	S	4	4	256	256	1024	1024	1024	2	2	128	128	512	512	512
CH2824	1	S	1	1	64	64	64	64	64	1	1	64	64	64	64	64
CH2829	1	S	64	64	64	256	256	256	256	64	64	64	256	256	256	256
CH2848	2	S	16	16	16	64	256	256	256	8	8	8	32	128	128	128
CH2860	1	S	64	64	64	256	256	256	256	64	64	64	256	256	256	256
CH2875	32	R	1	4	256	1024	1024	1024	1024	0.03125	0.125	8	32	32	32	32
CH2922	0.5	S	4	4	64	64	64	256	256	8	8	128	128	128	512	512
CH2939	2	S	4	64	256	256	1024	1024	1024	2	32	128	128	512	512	512
CH3177	0.25	S	1	64	256	256	256	256	256	4	256	1024	1024	1024	1024	1024
CH3290	32	R	256	1024	1024	1024	1024	>1024	>1024	8	32	32	32	32	>32	>32
CH3325	0.25	S	4	64	256	256	256	256	256	16	256	1024	1024	1024	1024	1024
CH3462	0.5	S	4	256	1024	>1024	>1024	>1024	>1024	8	512	2048	>2048	>2048	>2048	>2048
CH3466	0.5	S	16	256	256	256	256	256	256	32	512	512	512	512	512	512
CH3484	0.25	S	16	64	64	64	256	256	256	64	256	256	256	1024	1024	1024
CH3549	0.5	S	1	64	256	256	256	1024	1024	2	128	512	512	512	2048	2048
CH3797	2	S	16	1024	1024	1024	1024	>1024	>1024	8	512	512	512	512	>512	>512
CH3882	1	S	1	16	256	256	256	>1024	>1024	1	16	256	256	256	>1024	>1024
CH3906	2	S	1	4	1	16	16	16	16	0.5	2	0.5	8	8	8	8
CH4083	1	S	4	4	256	256	256	1024	1024	4	4	256	256	256	1024	1024
CH4418	0.5	S	64	64	256	1024	1024	1024	1024	128	128	512	2048	2048	2048	2048
CH4438	2	S	16	16	256	1024	1024	1024	1024	8	8	128	512	512	512	512
CH4443	256	R	>1024	>1024	>1024	>1024	>1024	>1024	>1024	>4	>4	>4	>4	>4	>4	>4
CH4446	2	S	16	64	256	256	256	256	256	8	32	128	128	128	128	128
CH4489	0.5	S	16	16	256	1024	1024	1024	1024	32	32	512	2048	2048	2048	2048
CH4509	1	S	64	64	64	256	256	256	256	64	64	64	256	256	256	256
CH4520	0.5	S	1	4	16	64	64	64	64	2	8	32	128	128	128	128
CH4528	1	S	4	256	256	256	1024	1024	1024	4	256	256	256	1024	1024	1024
CH4549	0.5	S	16	64	64	256	256	256	256	32	128	128	512	512	512	512
CH4584	8	I	256	256	256	256	1024	>1024	>1024	32	32	32	32	128	>128	>128
CH4591	0.5	S	4	16	16	64	256	256	256	8	32	32	128	512	512	512
CH4602	0.25	S	16	16	64	64	256	256	256	64	64	256	256	1024	1024	1024
CH4634	1	S	64	1024	1024	>1024	>1024	>1024	>1024	64	1024	1024	>1024	>1024	>1024	>1024
CH4681	0.125	S	256	256	256	256	256	256	256	2048	2048	2048	2048	2048	2048	2048
CH4684	1	S	1	1	16	64	256	256	256	1	1	16	64	256	256	256
CH4703	4	S	1024	>1024	>1024	>1024	>1024	>1024	>1024	256	>256	>256	>256	>256	>256	>256
CH4755	0.25	S	64	64	256	256	256	256	256	256	256	1024	1024	1024	1024	1024
CH4757	1	S	1	16	16	64	64	64	64	1	16	16	64	64	64	64
CH4766	1	S	64	64	256	256	256	1024	1024	64	64	256	256	256	1024	1024
CH4780	2	S	16	16	64	256	1024	1024	1024	8	8	32	128	512	512	512
CH4785	1	S	1	64	256	256	1024	1024	1024	1	64	256	256	1024	1024	1024
CH4786	0.5	S	4	4	4	4	64	64	64	8	8	8	8	128	128	128
CH4840	2	S	4	4	64	64	256	256	256	2	2	32	32	128	128	128
CH4860	1	S	16	16	64	64	64	64	64	16	16	64	64	64	64	64
CH4878	0.5	S	4	16	16	256	256	256	256	8	32	32	512	512	512	512
CH4891	1	S	4	4	4	1024	1024	1024	1024	4	4	4	1024	1024	1024	1024
CH4914	0.25	S	1	1	64	256	256	256	256	4	4	256	1024	1024	1024	1024
CH4916	0.25	S	256	256	1024	1024	1024	1024	1024	1024	1024	4096	4096	4096	4096	4096
CH4990	1	S	4	16	16	64	64	256	256	4	16	16	64	64	256	256
CH4992	0.5	S	16	64	64	64	256	256	256	32	128	128	128	512	512	512
CH5052	16	R	256	256	256	1024	>1024	>1024	>1024	16	16	16	64	>64	>64	>64
CH5066	1	S	1	16	256	1024	1024	1024	1024	1	16	256	1024	1024	1024	1024
CH5182	1	S	4	4	64	256	256	256	256	4	4	64	256	256	256	256
CH5206	0.5	S	4	4	16	64	64	64	64	8	8	32	128	128	128	128
CH5262	0.5	S	16	16	16	64	64	256	256	32	32	32	128	128	512	512
CH5267	0.5	S	1	16	256	256	1024	1024	>1024	2	32	512	512	2048	2048	>2048
CH5291	1	S	64	256	256	1024	>1024	>1024	>1024	64	128	256	1024	>1024	>1024	>1024
CH5334	0.5	S	4	64	256	256	256	1024	1024	8	128	512	512	512	2048	2048
CH5353	0.5	S	1	4	64	256	1024	1024	1024	2	8	128	512	2048	2048	2048
CH5362	0.25	S	1	4	4	256	256	256	1024	4	16	16	1024	1024	1024	4096
CH5363	0.25	S	#N/A	#N/A	#N/A	#N/A	256	256	256	#N/A	#N/A	#N/A	#N/A	1024	1024	1024
CH5387	0.5	S	16	16	64	64	64	256	256	32	32	128	128	128	512	512
CH5432	8	I	16	1024	>1024	>1024	>1024	>1024	>1024	2	128	>128	>128	>128	>128	>128
CH5462	0.5	S	16	16	64	256	256	256	256	32	32	128	512	512	512	512
CH5478	0.5	S	64	256	1024	1024	1024	1024	1024	128	512	2048	2048	2048	2048	2048
CH5528	1	S	64	64	1024	1024	1024	1024	1024	64	64	1024	1024	1024	1024	1024
CH5531	4	S	16	256	256	256	1024	1024	1024	4	64	64	64	256	256	256
CH5548	2	S	4	4	16	16	16	64	64	2	2	8	8	8	32	32
CH5550	4	S	16	16	256	1024	1024	1024	1024	4	4	64	256	256	256	256
CH5591	64	R	1024	1024	1024	>1024	>1024	>1024	>1024	16	16	16	>16	>16	>16	>16
CH5596	1	S	4	4	16	64	256	256	256	4	4	16	64	256	256	256
CH5597	1	S	1	64	64	256	256	256	256	1	64	64	256	256	256	256
CH5621	4	S	64	1024	1024	>1024	>1024	>1024	>1024	16	256	256	>256	>256	>256	>256
CH5638	1	S	16	16	1024	1024	1024	1024	1024	16	16	1024	1024	1024	1024	1024
ESP001	2	S	16	256	256	256	1024	1024	1024	8	128	128	128	512	512	512
ESP002	2	S	256	256	256	256	256	256	256	128	128	128	128	128	128	128
ESP003	2	S	16	256	1024	1024	1024	1024	1024	8	128	512	512	512	512	512
ESP004	128	R	256	1024	1024	1024	>1024	>1024	>1024	2	8	8	8	>8	>8	>8
ESP006	16	R	16	64	64	256	1024	1024	1024	1	4	4	16	64	64	64
ESP009	2	S	16	16	64	256	1024	1024	1024	8	8	32	128	512	512	512
ESP011	0.25	S	16	256	1024	1024	1024	1024	1024	64	1024	4096	4096	4096	4096	4096
ESP012	64	R	256	>1024	>1024	>1024	>1024	>1024	>1024	4	>16	>16	>16	>16	>16	>16
ESP013	16	R	>1024	>1024	>1024	>1024	>1024	>1024	>1024	>64	>64	>64	>64	>64	>64	>64
ESP015	4	S	4	64	256	256	256	256	256	1	16	64	64	64	64	64
ESP020	1	S	4	256	256	256	256	256	256	4	256	256	256	256	256	256
ESP021	1	S	4	4	64	64	64	64	64	4	4	64	64	64	64	64
ESP022	0.5	S	16	16	16	16	256	256	256	32	32	32	32	512	512	512
ESP023	2	S	1	16	16	16	16	16	16	0.5	8	8	8	8	8	8
ESP024	1	S	1	4	16	16	64	64	64	1	4	16	16	64	64	64
ESP025	16	R	1024	>1024	>1024	>1024	>1024	>1024	>1024	64	>64	>64	>64	>64	>64	>64
ESP027	2	S	1	4	16	1024	1024	1024	1024	0.5	2	8	512	512	512	512
ESP028	2	S	16	256	1024	1024	1024	1024	1024	8	128	512	512	512	512	512
ESP029	2	S	4	4	256	256	256	256	256	2	2	128	128	128	128	128
ESP031	1	S	1024	1024	1024	1024	1024	1024	1024	1024	1024	1024	1024	1024	1024	1024
ESP032	2	S	256	256	256	1024	1024	>1024	>1024	128	128	128	512	512	>512	>512
ESP033	2	S	16	64	64	64	256	256	256	8	32	32	32	128	128	128
ESP034	2	S	4	16	256	1024	1024	1024	1024	2	8	128	512	512	512	512
ESP035	2	S	256	256	256	256	1024	1024	1024	128	128	128	128	512	512	512
ESP036	1	S	1	4	16	16	16	64	64	1	4	16	16	16	64	64
ESP037	2	S	4	4	4	64	64	64	256	2	2	2	32	32	32	128
ESP038	1	S	1	4	4	4	16	64	64	1	4	4	4	16	64	64
ESP039	2	S	4	16	16	64	256	256	256	2	8	8	32	128	128	128
ESP040	8	I	4	16	16	64	64	64	64	0.5	2	2	8	8	8	8
ESP044	2	S	4	64	256	256	256	256	256	2	32	128	128	128	128	128
ESP046	2	S	16	1024	1024	1024	1024	1024	1024	8	512	512	512	512	512	512
ESP050	2	S	64	1024	1024	1024	1024	1024	1024	32	512	512	512	512	512	512
ESP054	2	S	4	4	4	256	256	256	256	2	2	2	128	128	128	128
ESP055	1	S	1	16	16	16	16	64	64	1	16	16	16	16	64	64
ESP057	0.5	S	1	#N/A	#N/A	256	256	256	256	2	#N/A	#N/A	512	512	512	512
ESP058	1	S	4	16	16	64	64	64	64	4	16	16	64	64	64	64
ESP059	2	S	1	4	256	256	256	256	256	0.5	2	128	128	128	128	128
ESP060	32	R	>1024	>1024	>1024	>1024	>1024	>1024	>1024	>32	>32	>32	>32	>32	>32	>32
ESP063	128	R	256	1024	>1024	>1024	>1024	>1024	>1024	2	8	>8	>8	>8	>8	>8
ESP066	4	S	256	256	>1024	>1024	>1024	>1024	>1024	64	64	>256	>256	>256	>256	>256
ESP067	1	S	4	16	256	256	1024	1024	1024	4	16	256	256	1024	1024	1024
ESP070	4	S	1024	1024	>1024	>1024	>1024	>1024	>1024	256	256	>256	>256	>256	>256	>256
ESP072	1	S	4	16	256	256	256	256	256	4	16	256	256	256	256	256
ESP073	2	S	16	16	64	64	256	256	256	8	8	32	32	128	128	128
ESP075	0.25	S	1	4	4	64	256	256	256	4	16	16	256	1024	1024	1024
ESP076	0.25	S	>1024	>1024	>1024	>1024	>1024	>1024	>1024	>4096	>4096	>4096	>4096	>4096	>4096	>4096
ESP077	256	R	1024	1024	1024	1024	>1024	>1024	>1024	4	4	4	4	>4	>4	>4
ESP081	2	S	4	16	16	64	64	64	64	2	8	8	32	32	32	32
ESP083	64	R	>1024	>1024	>1024	>1024	>1024	>1024	>1024	>16	>16	>16	>16	>16	>16	>16
ESP088	256	R	256	1024	1024	>1024	>1024	>1024	>1024	1	4	4	>4	>4	>4	>4
ESP091	2	S	64	64	64	1024	1024	1024	1024	32	32	32	512	512	512	512
ESP093	128	R	4	1024	>1024	>1024	>1024	>1024	>1024	0.03125	8	>8	>8	>8	>8	>8
F1659	0.5	S	4	16	256	256	1024	1024	1024	8	32	512	512	2048	2048	2048
F1688	0.5	S	4	4	64	256	256	256	256	8	8	128	512	512	512	512
F1689	0.5	S	4	4	64	#N/A	#N/A	#N/A	#N/A	8	8	128	#N/A	#N/A	#N/A	#N/A
F1706	0.5	S	4	16	16	16	64	256	256	8	32	32	32	128	512	512
F1720	0.5	S	4	64	1024	1024	>1024	>1024	>1024	8	128	2048	2048	>2048	>2048	>2048
F1727	0.25	S	4	4	1024	1024	1024	1024	1024	16	16	4096	4096	4096	4096	4096
F1748	0.5	S	4	16	16	16	16	16	256	8	32	32	32	32	32	512
F1757	1	S	1	64	>1024	>1024	>1024	>1024	>1024	1	64	>1024	>1024	>1024	>1024	>1024
F1758	0.25	S	16	256	256	1024	1024	1024	1024	64	1024	1024	4096	4096	4096	4096
F1759	2	S	1	4	16	64	64	256	256	0.5	2	8	32	32	128	128
F1764	4	S	16	64	1024	1024	>1024	>1024	>1024	4	16	256	256	>256	>256	>256
F1775	0.5	S	1	1	4	16	64	1024	1024	2	2	8	32	128	2048	2048
F1800	0.25	S	1	1	4	256	1024	1024	1024	4	4	16	1024	4096	4096	4096
F1801	0.5	S	1	4	4	256	256	256	256	2	8	8	512	512	512	512
F1823	0.5	S	4	64	>1024	>1024	>1024	>1024	>1024	8	128	>2048	>2048	>2048	>2048	>2048
F1856	0.5	S	256	1024	1024	1024	1024	1024	1024	512	2048	2048	2048	2048	2048	2048
F1862	2	S	64	256	256	256	256	256	256	32	128	128	128	128	128	128
F1864	128	R	1024	1024	1024	1024	1024	1024	>1024	8	8	8	8	8	8	>8
F1880	4	S	64	1024	1024	1024	1024	1024	1024	16	256	256	256	256	256	256
F1883	2	S	64	256	#N/A	#N/A	#N/A	#N/A	#N/A	32	128	#N/A	#N/A	#N/A	#N/A	#N/A
F1894	0.25	S	4	16	64	#N/A	#N/A	256	256	16	64	256	#N/A	#N/A	1024	1024
F1957	1	S	256	1024	1024	1024	1024	1024	1024	256	1024	1024	1024	1024	1024	1024
F1959	8	I	16	64	1024	1024	1024	1024	>1024	2	8	128	128	128	128	>128
F1968	1	S	4	64	256	256	1024	1024	1024	4	64	256	256	1024	1024	1024
F1997	0.25	S	16	64	1024	1024	1024	1024	>1024	64	256	4096	4096	4096	4096	>4096
F2003	0.125	S	1	4	16	256	1024	1024	1024	8	32	128	2048	8192	8192	8192
F2005	1	S	1	16	16	16	1024	1024	1024	1	16	16	16	1024	1024	1024
F2006	0.5	S	1	1	16	64	64	64	64	2	2	32	128	128	128	128
F2010	1	S	64	64	64	256	1024	1024	1024	64	64	64	256	1024	1024	1024
F2017	1	S	16	256	256	256	>1024	>1024	>1024	16	256	256	256	>1024	>1024	>1024
F2020	0.5	S	16	16	64	256	256	1024	1024	32	32	128	512	512	2048	2048
F2026	0.5	S	256	256	>1024	>1024	>1024	>1024	>1024	512	512	>2048	>2048	>2048	>2048	>2048
F2029	0.5	S	4	256	256	256	256	256	256	8	512	512	512	512	512	512
F2030	128	R	256	1024	1024	1024	1024	>1024	>1024	2	8	8	8	8	>8	>8
F2034	0.5	S	4	256	256	>1024	>1024	>1024	>1024	8	512	512	>2048	>2048	>2048	>2048
F2035	2	S	16	64	1024	1024	1024	1024	1024	8	32	512	512	512	512	512
F2044	1	S	1	4	4	16	16	256	256	1	4	4	16	16	256	256
F2045	256	R	>1024	>1024	>1024	>1024	>1024	>1024	>1024	>4	>4	>4	>4	>4	>4	>4
F2055	64	R	1024	>1024	>1024	>1024	>1024	>1024	>1024	16	>16	>16	>16	>16	>16	>16
F2059	64	R	1024	>1024	>1024	>1024	>1024	>1024	>1024	16	>16	>16	>16	>16	>16	>16
F2065	0.5	S	4	64	64	256	1024	>1024	>1024	8	128	128	512	2048	>2048	>2048
F2075	1	S	16	64	256	256	#N/A	#N/A	#N/A	16	64	256	256	#N/A	#N/A	#N/A
F2081	0.5	S	4	64	#N/A	#N/A	1024	>1024	>1024	8	128	#N/A	#N/A	2048	>2048	>2048
F2084	0.5	S	16	64	256	1024	>1024	>1024	>1024	32	128	512	2048	>2048	>2048	>2048
F2093	2	S	4	64	64	64	64	256	256	2	32	32	32	32	128	128
F2119	8	I	64	256	1024	>1024	>1024	>1024	>1024	8	32	128	>128	>128	>128	>128
F2128	0.5	S	64	64	64	64	64	64	64	128	128	128	128	128	128	128
F2137	2	S	1	1	1	16	64	64	256	0.5	0.5	0.5	8	32	32	128
F2148	0.5	S	1	4	4	4	256	256	256	2	8	8	8	512	512	512
F2160	2	S	1	1	1	1024	1024	1024	1024	0.5	0.5	0.5	512	512	512	512
F2165	1	S	1	4	4	4	64	64	64	1	4	4	4	64	64	64
F2166	2	S	1	4	4	4	16	16	16	0.5	2	2	2	8	8	8
F2172	0.5	S	4	16	64	1024	1024	1024	1024	8	32	128	2048	2048	2048	2048
F2205	1	S	16	64	256	1024	>1024	>1024	>1024	16	64	256	1024	>1024	>1024	>1024
F2224	64	R	64	256	256	1024	1024	1024	>1024	1	4	4	16	16	16	>16
F2229	1	S	4	256	256	1024	1024	1024	1024	4	256	256	1024	1024	1024	1024
F2230	0.5	S	16	16	64	64	64	64	64	32	32	128	128	128	128	128
F2234	1	S	4	16	16	256	256	256	256	4	16	16	256	256	256	256
F2235	128	R	256	1024	1024	>1024	>1024	>1024	>1024	2	8	8	>8	>8	>8	>8
F2236	1	S	1	4	4	256	256	256	256	1	4	4	256	256	256	256
F2394	4	S	1024	>1024	>1024	>1024	>1024	>1024	>1024	256	>256	>256	>256	>256	>256	>256
F2805	32	R	64	256	1024	1024	>1024	>1024	>1024	2	8	32	32	>32	>32	>32
F2856	64	R	1024	>1024	>1024	>1024	>1024	>1024	>1024	16	>16	>16	>16	>16	>16	>16
F2942	8	I	256	>1024	>1024	>1024	>1024	>1024	>1024	32	>128	>128	>128	>128	>128	>128
M70563004	1	S	4	16	16	16	16	64	64	4	16	16	16	16	64	64
M70564993	0.5	S	4	64	64	256	256	256	256	8	128	128	512	512	512	512
M70565254	1	S	1	4	64	64	256	256	256	1	4	64	64	256	256	256
M70565897	1	S	16	64	64	256	256	256	256	16	64	64	256	256	256	256
M70604538	1	S	4	4	4	16	64	64	256	4	4	4	16	64	64	256
M70608424	1	S	4	16	64	64	256	256	256	4	16	64	64	256	256	256
M70639645	2	S	256	256	256	1024	1024	1024	1024	128	128	128	512	512	512	512
M70640096	0.25	S	16	16	16	16	16	64	64	64	64	64	64	64	256	256
M70641593	0.5	S	64	64	1024	1024	1024	1024	1024	128	128	2048	2048	2048	2048	2048
M70646050	0.5	S	1	4	16	64	64	64	64	2	8	32	128	128	128	128
M70646077	0.5	S	1	1	4	>1024	>1024	>1024	>1024	2	2	8	>2048	>2048	>2048	>2048
M70647319	2	S	4	256	256	256	>1024	>1024	>1024	2	128	128	128	>512	>512	>512
M70649365	2	S	16	16	64	256	256	1024	1024	8	8	32	128	128	512	512
M70652746	0.5	S	256	256	256	256	256	256	256	512	512	512	512	512	512	512
M70656672	0.25	S	1	1	16	16	16	64	64	4	4	64	64	64	256	256
M70663247	1	S	4	4	4	64	256	256	256	4	4	4	64	256	256	256
MD10010	1	S	16	16	64	256	256	256	256	16	16	64	256	256	256	256
MD1037	1	S	1	4	64	256	256	256	256	1	4	64	256	256	256	256
MD1496	0.5	S	64	#N/A	#N/A	#N/A	256	256	256	128	#N/A	#N/A	#N/A	512	512	512
MD3496	1	S	16	256	256	256	256	256	256	16	256	256	256	256	256	256
MD4301	1	S	16	256	256	256	256	256	256	16	256	256	256	256	256	256
MD6136	1	S	256	256	256	256	1024	1024	1024	256	256	256	256	1024	1024	1024
MD6439	0.5	S	1	1	16	256	256	256	256	2	2	32	512	512	512	512
MD8034	1	S	1	16	16	16	16	16	16	1	16	16	16	16	16	16
MD8386	1	S	256	256	256	256	1024	1024	1024	256	256	256	256	1024	1024	1024
MD8672	1	S	4	16	16	256	256	256	256	4	16	16	256	256	256	256
MD9120	0.5	S	4	16	64	64	64	64	64	8	32	128	128	128	128	128
MD9121	2	S	16	16	16	16	16	64	64	8	8	8	8	8	32	32
MD9481	2	S	4	16	16	16	64	64	64	2	8	8	8	32	32	32
MD9723	1	S	1	4	#N/A	#N/A	256	256	256	1	4	#N/A	#N/A	256	256	256
MD9965_1	2	S	1	1	1	16	16	64	64	0.5	0.5	0.5	8	8	32	32
MD9965_2	2	S	1	1	4	64	256	256	256	0.5	0.5	2	32	128	128	128
MHH0147	2	S	4	256	1024	>1024	>1024	>1024	>1024	2	128	512	>512	>512	>512	>512
MHH0426	1	S	1024	1024	>1024	>1024	>1024	>1024	>1024	1024	1024	>1024	>1024	>1024	>1024	>1024
MHH0927	0.5	S	16	256	256	1024	1024	1024	1024	32	512	512	2048	2048	2048	2048
MHH0985	8	I	>1024	>1024	>1024	>1024	>1024	>1024	>1024	>128	>128	>128	>128	>128	>128	>128
MHH14911	0.25	S	64	256	256	1024	1024	1024	1024	256	1024	1024	4096	4096	4096	4096
MHH14929	0.25	S	1	16	64	256	256	1024	1024	4	64	256	1024	1024	4096	4096
MHH14990	0.25	S	16	16	64	256	256	256	256	64	64	256	1024	1024	1024	1024
MHH15015	1	S	256	1024	1024	1024	1024	1024	1024	256	1024	1024	1024	1024	1024	1024
MHH15103	0.5	S	1	4	64	#N/A	#N/A	#N/A	#N/A	2	8	128	#N/A	#N/A	#N/A	#N/A
MHH15151	2	S	16	16	64	64	64	64	64	8	8	32	32	32	32	32
MHH15187	0.5	S	1	16	256	256	256	256	256	2	32	512	512	512	512	512
MHH15204	0.5	S	1	64	1024	1024	1024	1024	1024	2	128	2048	2048	2048	2048	2048
MHH15275	32	R	1024	>1024	>1024	>1024	>1024	>1024	>1024	32	>32	>32	>32	>32	>32	>32
MHH15280	1	S	64	64	256	1024	1024	1024	1024	64	64	256	1024	1024	1024	1024
MHH15286	0.5	S	1	1	16	64	256	256	256	2	2	32	128	512	512	512
MHH15817	1	S	1	64	256	256	256	256	256	1	64	256	256	256	256	256
MHH16050	4	S	16	1024	>1024	>1024	>1024	>1024	>1024	4	256	>256	>256	>256	>256	>256
MHH16208	1	S	1	4	16	256	256	256	256	1	4	16	256	256	256	256
MHH16371	0.25	S	16	16	64	256	256	256	256	64	64	256	1024	1024	1024	1024
MHH16379	1	S	1	4	16	256	256	256	256	1	4	16	256	256	256	256
MHH16427	1	S	4	16	64	256	256	1024	1024	4	16	64	256	256	1024	1024
MHH16459	4	S	256	256	1024	>1024	>1024	>1024	>1024	64	64	256	>256	>256	>256	>256
MHH16513	1	S	4	4	4	4	16	64	256	4	4	4	4	16	64	256
MHH16530	1	S	64	256	256	1024	1024	1024	1024	64	256	256	1024	1024	1024	1024
MHH16563	2	S	64	256	1024	1024	>1024	>1024	>1024	32	128	512	512	>512	>512	>512
MHH16610	1	S	1	4	64	256	1024	1024	1024	1	4	64	256	1024	1024	1024
MHH16727	1	S	256	256	256	1024	1024	1024	1024	256	256	256	1024	1024	1024	1024
MHH16798	1	S	1	16	16	16	64	64	64	1	16	16	16	64	64	64
MHH16951	8	I	#N/A	#N/A	#N/A	#N/A	1024	>1024	>1024	#N/A	#N/A	#N/A	#N/A	128	>128	>128
MHH17247	0.5	S	4	4	4	16	16	64	64	8	8	8	32	32	128	128
MHH17501	1	S	64	64	64	256	1024	1024	1024	64	64	64	256	1024	1024	1024
MHH17546	16	R	1	64	1024	1024	>1024	>1024	>1024	0.0625	4	64	64	>64	>64	>64
MHH17704	1	S	4	16	64	64	64	64	64	4	16	64	64	64	64	64
MHH17767	1024	R	256	>1024	>1024	>1024	>1024	>1024	>1024	0.25	>1	>1	>1	>1	>1	>1
MHH17783	1	S	4	16	256	256	256	256	256	4	16	256	256	256	256	256
MHH1883	1	S	1	64	256	256	1024	>1024	>1024	1	64	256	256	1024	>1024	>1024
MHH2419	4	S	>1024	>1024	>1024	>1024	>1024	>1024	>1024	>256	>256	>256	>256	>256	>256	>256
MS1	0.5	S	64	256	1024	1024	1024	1024	1024	128	512	2048	2048	2048	2048	2048
MS2	1	S	64	256	1024	1024	1024	1024	1024	64	256	1024	1024	1024	1024	1024
MS5	0.5	S	256	256	1024	1024	1024	1024	1024	512	512	2048	2048	2048	2048	2048
PSAE1401	0.25	S	4	16	64	256	256	256	256	16	64	256	1024	1024	1024	1024
PSAE1438	4	S	1	16	16	16	256	256	256	0.25	4	4	4	64	64	64
PSAE1439	2	S	4	64	#N/A	1024	1024	1024	1024	2	32	#N/A	512	512	512	512
PSAE1630	2	S	1	1024	>1024	>1024	>1024	>1024	>1024	0.5	512	>512	>512	>512	>512	>512
PSAE1635	2	S	4	4	4	64	1024	1024	1024	2	2	2	32	512	512	512
PSAE1641	0.5	S	1	1	4	4	16	256	256	2	2	8	8	32	512	512
PSAE1642	0.5	S	16	16	16	64	64	256	256	32	32	32	128	128	512	512
PSAE1645	0.5	S	1	4	16	64	64	64	64	2	8	32	128	128	128	128
PSAE1647	1	S	4	4	16	64	64	256	256	4	4	16	64	64	256	256
PSAE1649	0.125	S	1	1	16	16	64	64	64	8	8	128	128	512	512	512
PSAE1651	1	S	1	1	16	256	256	1024	1024	1	1	16	256	256	1024	1024
PSAE1654	2	S	4	64	64	64	256	256	256	2	32	32	32	128	128	128
Psae1656	0.5	S	16	16	64	64	64	64	64	32	32	128	128	128	128	128
PSAE1745	64	R	1024	1024	1024	1024	>1024	>1024	>1024	16	16	16	16	>16	>16	>16
PSAE1837	2	S	4	64	1024	1024	1024	1024	1024	2	32	512	512	512	512	512
PSAE1872	2	S	4	4	64	64	256	256	1024	2	2	32	32	128	128	512
PSAE1903	4	S	16	256	256	256	256	256	256	4	64	64	64	64	64	64
PSAE1934	0.5	S	1	1	4	4	16	16	64	2	2	8	8	32	32	128
PSAE1975	4	S	16	16	64	64	64	64	64	4	4	16	16	16	16	16
PSAE1984	2	S	4	4	64	256	256	256	256	2	2	32	128	128	128	128
PSAE2125	0.5	S	16	64	256	1024	1024	1024	1024	32	128	512	2048	2048	2048	2048
PSAE2126	1	S	1	1	4	64	64	64	64	1	1	4	64	64	64	64
PSAE2325	1	S	4	4	4	4	16	64	64	4	4	4	4	16	64	64
Vb3320	0.5	S	1	1	4	4	4	16	64	2	2	8	8	8	32	128
ZG02488718	0.25	S	1	4	256	256	256	256	256	4	16	1024	1024	1024	1024	1024
ZG02512057	1	S	16	16	256	256	1024	1024	1024	16	16	256	256	1024	1024	1024
ZG205565	0.25	S	1	16	16	16	16	64	64	4	64	64	64	64	256	256
ZG205694	0.125	S	64	256	256	1024	1024	1024	1024	512	2048	2048	8192	8192	8192	8192
ZG205710	0.25	S	4	16	16	256	256	256	256	16	64	64	1024	1024	1024	1024
ZG301975	1	S	1	16	16	64	256	256	256	1	16	16	64	256	256	256
ZG302359	0.5	S	1	64	256	256	1024	1024	1024	2	128	512	512	2048	2048	2048
ZG302367	1	S	4	64	256	256	256	256	256	4	64	256	256	256	256	256
ZG302368	0.5	S	4	16	64	64	64	64	64	8	32	128	128	128	128	128
ZG302370	1	S	4	16	64	64	64	64	64	4	16	64	64	64	64	64
ZG302383	0.5	S	1	4	256	256	256	256	256	2	8	512	512	512	512	512
ZG302431	1	S	4	16	16	64	256	256	256	4	16	16	64	256	256	256
ZG302432	2	S	4	4	4	256	256	256	256	2	2	2	128	128	128	128
ZG302442	1	S	256	256	256	256	256	256	256	256	256	256	256	256	256	256
ZG302451	1	S	4	4	16	256	256	256	256	4	4	16	256	256	256	256
ZG314696	0.25	S	4	4	16	64	64	64	256	16	16	64	256	256	256	1024
ZG314738	2	S	64	64	64	64	256	256	256	32	32	32	32	128	128	128
ZG314777	1	S	16	16	16	64	64	64	64	16	16	16	64	64	64	64
ZG316694	1	S	1	4	16	64	64	64	64	1	4	16	64	64	64	64
ZG316704	1	S	4	16	256	256	256	256	256	4	16	256	256	256	256	256
ZG316716	1	S	1	4	4	4	64	64	64	1	4	4	4	64	64	64
ZG316717	8	I	16	16	16	64	1024	1024	1024	2	2	2	8	128	128	128
ZG316722	1	S	4	16	256	256	256	256	256	4	16	256	256	256	256	256
ZG5003493	4	S	1	4	64	64	#N/A	#N/A	1024	0.25	1	16	16	#N/A	#N/A	256
ZG8038581181	1	S	16	256	256	1024	1024	1024	1024	16	256	256	1024	1024	1024	1024
ZG8510487	256	R	16	256	256	1024	1024	>1024	>1024	0.0625	1	1	4	4	>4	>4

## Sheet: CIP
	Ciprofloxacin		Minimum antibiotic concentration of killing (MCK)							Biofilm tolerance factor (BTF)
			MCK90	MCK99	MCK99.9	MCK99.99	MCK99.999	MCK99.9999	MCK-E	BTF-1	BTF-2	BTF-3	BTF-4	BTF-5	BTF-6	BTF-E
isolate	MIC	CLSI	-1 log	-2 log	-3 log	-4 log	-5 log	-6 log	eradication	-1 log	-2 log	-3 log	-4 log	-5 log	-6 log	eradication
CF577_Iso7	4	R	256	256	1024	1024	1024	1024	1024	64	64	256	256	256	256	256
CF590_Iso5	2	R	4	64	256	256	256	256	256	2	32	128	128	128	128	128
CF592_Iso2	0.125	S	1	1	1	1024	1024	1024	1024	8	8	8	8192	8192	8192	8192
CF609_Iso3	0.5	S	1	1	1	4	4	256	1024	2	2	2	8	8	512	2048
CF609_Iso4	8	R	1	1	256	1024	1024	1024	1024	0.125	0.125	32	128	128	128	128
CF609_Iso5	2	R	256	256	1024	1024	1024	1024	1024	128	128	512	512	512	512	512
CF610_Iso3	1	I	1	4	256	1024	1024	1024	>1024	1	4	256	1024	1024	1024	>1024
CH2500	8	R	16	256	256	256	>1024	>1024	>1024	2	32	32	32	>128	>128	>128
CH2502	0.5	S	1	1	1	1	1	1024	1024	2	2	2	2	2	2048	2048
CH2522	2	R	4	4	4	256	256	1024	1024	2	2	2	128	128	512	512
CH2527	0.25	S	1	1	1	1	1024	1024	1024	4	4	4	4	4096	4096	4096
CH2582	4	R	256	256	1024	1024	1024	1024	1024	64	64	256	256	256	256	256
CH2597	1	I	1	1	1	64	64	256	256	1	1	1	64	64	256	256
CH2598	0.25	S	1	1	4	256	256	256	256	4	4	16	1024	1024	1024	1024
CH2658	8	R	16	64	1024	1024	1024	1024	>1024	2	8	128	128	128	128	>128
CH2660	1	I	1	1	256	256	256	>1024	>1024	1	1	256	256	256	>1024	>1024
CH2672	16	R	64	256	1024	1024	1024	1024	1024	4	16	64	64	64	64	64
CH2677	64	R	256	1024	>1024	>1024	>1024	>1024	>1024	4	16	>16	>16	>16	>16	>16
CH2678	16	R	1	1	256	256	256	256	1024	0.0625	0.0625	16	16	16	16	64
CH2680	0.5	S	1	1	1	64	256	1024	1024	2	2	2	128	512	2048	2048
CH2682	0.5	S	1	1	1	4	256	256	256	2	2	2	8	512	512	512
CH2685	0.5	S	1	1	1	1	16	1024	1024	2	2	2	2	32	2048	2048
CH2687	16	R	4	4	256	1024	1024	1024	1024	0.25	0.25	16	64	64	64	64
CH2690	0.25	S	1	1	1	4	256	256	1024	4	4	4	16	1024	1024	4096
CH2698	8	R	16	256	1024	1024	1024	>1024	>1024	2	32	128	128	128	>128	>128
CH2706	32	R	16	64	256	256	1024	1024	1024	0.5	2	8	8	32	32	32
CH2707	0.25	S	1	1	4	256	256	256	256	4	4	16	1024	1024	1024	1024
CH2713	0.25	S	1	1	1	64	1024	1024	1024	4	4	4	256	4096	4096	4096
CH2718	0.25	S	1	1	1	4	64	256	256	4	4	4	16	256	1024	1024
CH2724	0.125	S	1	1	256	256	256	256	256	8	8	2048	2048	2048	2048	2048
CH2730	0.0625	S	1	1	1	1	1	256	256	16	16	16	16	16	4096	4096
CH2734	4	R	1	16	256	1024	1024	1024	1024	0.25	4	64	256	256	256	256
CH2735	8	R	64	256	256	256	1024	1024	1024	8	32	32	32	128	128	128
CH2747	0.5	S	1	1	1	1	1	1	4	2	2	2	2	2	2	8
CH2756	0.25	S	1	1	1	1	1	256	256	4	4	4	4	4	1024	1024
CH2764	1	I	256	1024	1024	1024	1024	1024	1024	256	1024	1024	1024	1024	1024	1024
CH2824	0.5	S	1	1	1	4	1024	1024	1024	2	2	2	8	2048	2048	2048
CH2829	1	I	1	4	4	256	256	1024	1024	1	4	4	256	256	1024	1024
CH2848	0.5	S	1	1	#N/A	#N/A	256	256	256	2	2	#N/A	#N/A	512	512	512
CH2860	8	R	64	256	256	1024	1024	1024	>1024	8	32	32	128	128	128	>128
CH2875	2	R	1	1	4	4	4	256	256	0.5	0.5	2	2	2	128	128
CH2922	1	I	1	4	4	64	256	256	256	1	4	4	64	256	256	256
CH2939	0.125	S	1	1	1	1024	1024	1024	1024	8	8	8	8192	8192	8192	8192
CH3177	0.25	S	1	1	1	1	256	1024	1024	4	4	4	4	1024	4096	4096
CH3290	8	R	256	256	256	256	1024	1024	1024	32	32	32	32	128	128	128
CH3325	1	I	4	4	4	256	1024	1024	1024	4	4	4	256	1024	1024	1024
CH3462	0.125	S	1	4	256	256	1024	>1024	>1024	8	32	2048	2048	8192	>8192	>8192
CH3466	4	R	1024	1024	1024	1024	>1024	>1024	>1024	256	256	256	256	>256	>256	>256
CH3484	2	R	1	1	256	256	1024	1024	1024	0.5	0.5	128	128	512	512	512
CH3549	1	I	4	4	256	256	1024	1024	1024	4	4	256	256	1024	1024	1024
CH3797	16	R	16	16	1024	1024	1024	1024	1024	1	1	64	64	64	64	64
CH3882	4	R	1	1	256	1024	1024	>1024	>1024	0.25	0.25	64	256	256	>256	>256
CH3906	0.5	S	1	1	4	256	256	256	1024	2	2	8	512	512	512	2048
CH4083	0.5	S	1	4	1024	1024	1024	1024	1024	2	8	2048	2048	2048	2048	2048
CH4418	0.25	S	1	1	16	256	256	256	256	4	4	64	1024	1024	1024	1024
CH4438	8	R	1	16	256	256	1024	1024	1024	0.125	2	32	32	128	128	128
CH4443	32	R	256	256	1024	1024	1024	1024	1024	8	8	32	32	32	32	32
CH4446	2	R	1	1	256	256	256	1024	1024	0.5	0.5	128	128	128	512	512
CH4489	0.25	S	1	1	256	1024	1024	>1024	>1024	4	4	1024	4096	4096	>4096	>4096
CH4509	0.125	S	1	#N/A	#N/A	1024	1024	1024	1024	8	#N/A	#N/A	8192	8192	8192	8192
CH4520	0.0625	S	4	256	256	256	256	256	1024	64	4096	4096	4096	4096	4096	16384
CH4528	16	R	256	1024	1024	1024	1024	1024	>1024	16	64	64	64	64	64	>64
CH4549	0.03125	S	1	1	256	256	256	256	256	32	32	8192	8192	8192	8192	8192
CH4584	64	R	256	256	256	1024	>1024	>1024	>1024	4	4	4	16	>16	>16	>16
CH4591	2	R	1	4	64	1024	1024	>1024	>1024	0.5	2	32	512	512	>512	>512
CH4602	0.0625	S	1	1	1	256	256	256	256	16	16	16	4096	4096	4096	4096
CH4634	16	R	64	256	256	1024	1024	1024	1024	4	16	16	64	64	64	64
CH4681	0.0625	S	256	1024	1024	1024	1024	1024	1024	4096	16384	16384	16384	16384	16384	16384
CH4684	0.5	S	1	1	4	4	256	256	256	2	2	8	8	512	512	512
CH4703	2	R	256	256	1024	1024	1024	>1024	>1024	128	128	512	512	512	>512	>512
CH4704	0.5	S	1	4	64	64	1024	1024	1024	2	8	128	128	2048	2048	2048
CH4733	1	I	1	4	64	256	1024	1024	1024	1	4	64	256	1024	1024	1024
CH4755	64	R	256	256	256	256	1024	>1024	>1024	4	4	4	4	16	>16	>16
CH4757	0.125	S	1	1	1	4	256	256	256	8	8	8	32	2048	2048	2048
CH4766	2	R	256	256	256	256	1024	1024	1024	128	128	128	128	512	512	512
CH4780	32	R	16	256	256	256	1024	1024	1024	0.5	8	8	8	32	32	32
CH4785	4	R	1	256	256	256	1024	>1024	>1024	0.25	64	64	64	256	>256	>256
CH4786	64	R	16	16	16	256	1024	>1024	>1024	0.25	0.25	0.25	4	16	>16	>16
CH4840	0.25	S	1	1	1	16	256	256	256	4	4	4	64	1024	1024	1024
CH4860	64	R	256	256	256	256	1024	>1024	>1024	4	4	4	4	16	>16	>16
CH4878	1	I	1	1	16	256	256	1024	1024	1	1	16	256	256	1024	1024
CH4891	0.5	S	1	1	1	1	16	256	256	2	2	2	2	32	512	512
CH4914	2	R	4	64	256	256	256	256	1024	2	32	128	128	128	128	512
CH4916	0.25	S	1	1	256	256	256	1024	1024	4	4	1024	1024	1024	4096	4096
CH4990	0.5	S	1	1	1	1	256	256	256	2	2	2	2	512	512	512
CH4992	16	R	256	256	1024	1024	1024	1024	1024	16	16	64	64	64	64	64
CH5052	4	R	16	256	256	256	1024	1024	>1024	4	64	64	64	256	256	>256
CH5066	0.5	S	1	1	256	256	1024	1024	1024	2	2	512	512	2048	2048	2048
CH5182	2	R	4	4	4	64	1024	1024	1024	2	2	2	32	512	512	512
CH5206	0.25	S	1	1	64	256	256	256	256	4	4	256	1024	1024	1024	1024
CH5262	0.5	S	1	1	1	64	256	256	256	2	2	2	128	512	512	512
CH5267	0.5	S	4	256	1024	1024	1024	1024	>1024	8	512	2048	2048	2048	2048	>2048
CH5291	0.5	S	1	4	4	256	1024	1024	1024	2	8	8	512	2048	2048	2048
CH5334	4	R	4	256	1024	1024	1024	1024	1024	1	64	256	256	256	256	256
CH5353	0.0625	S	1	1	256	256	256	256	256	16	16	4096	4096	4096	4096	4096
CH5362	2	R	4	4	256	256	1024	1024	1024	2	2	128	128	512	512	512
CH5363	0.25	S	1	1	1	4	256	256	256	4	4	4	16	1024	1024	1024
CH5387	1	I	4	4	4	256	256	1024	1024	4	4	4	256	256	1024	1024
CH5432	128	R	1024	1024	>1024	>1024	>1024	>1024	>1024	8	8	>8	>8	>8	>8	>8
CH5462	0.5	S	1	256	256	256	256	1024	1024	2	512	512	512	512	2048	2048
CH5478	0.25	S	1	1	1	1	1024	1024	1024	4	4	4	4	4096	4096	4096
CH5528	128	R	1024	>1024	>1024	>1024	>1024	>1024	>1024	8	>8	>8	>8	>8	>8	>8
CH5531	2	R	256	256	256	256	#N/A	1024	1024	128	128	128	128	#N/A	512	512
CH5548	2	R	16	64	1024	1024	1024	>1024	>1024	8	32	512	512	512	>512	>512
CH5550	4	R	16	16	>1024	>1024	>1024	>1024	>1024	4	4	>256	>256	>256	>256	>256
CH5591	16	R	64	64	1024	1024	1024	1024	>1024	2	4	32	32	64	64	>64
CH5596	0.5	S	1	1	1	1	1	256	256	2	2	2	2	2	512	512
CH5597	0.25	S	1	1	1	256	256	256	256	4	4	4	1024	1024	1024	1024
CH5621	4	R	4	256	1024	1024	1024	1024	1024	1	64	256	256	256	256	256
CH5638	8	R	4	256	1024	1024	1024	>1024	>1024	0.5	32	128	128	128	>128	>128
ESP001	0.5	S	1	1	256	256	256	256	256	2	2	512	512	512	512	512
ESP002	0.5	S	1	1	1	256	256	256	256	2	2	2	512	512	512	512
ESP003	0.125	S	16	64	256	256	1024	1024	1024	128	512	2048	2048	8192	8192	8192
ESP004	0.25	S	4	4	4	256	256	256	256	16	16	16	1024	1024	1024	1024
ESP006	1	I	4	16	1024	1024	1024	1024	1024	4	16	1024	1024	1024	1024	1024
ESP009	2	R	1	4	16	16	256	1024	1024	0.5	2	8	8	128	512	512
ESP011	0.5	S	1	1	1	4	256	256	256	2	2	2	8	512	512	512
ESP012	4	R	16	256	256	1024	1024	1024	1024	4	64	64	256	256	256	256
ESP013	1	I	4	256	256	256	1024	1024	1024	4	256	256	256	1024	1024	1024
ESP015	0.5	S	1	1	1	16	256	1024	1024	2	2	2	32	512	2048	2048
ESP020	0.125	S	1	256	256	256	256	256	256	8	2048	2048	2048	2048	2048	2048
ESP021	0.125	S	1	1	1	16	256	256	256	8	8	8	128	2048	2048	2048
ESP022	0.125	S	1	4	4	16	256	256	256	8	32	32	128	2048	2048	2048
ESP023	1	I	1	1	1	1	1	4	4	1	1	1	1	1	4	4
ESP024	0.125	S	1	1	1	1	1	16	64	8	8	8	8	8	128	512
ESP025	1	I	1	16	1024	1024	1024	1024	1024	1	16	1024	1024	1024	1024	1024
ESP027	1	I	64	256	1024	1024	1024	1024	1024	64	256	1024	1024	1024	1024	1024
ESP028	0.125	S	1	1	64	256	256	1024	1024	8	8	512	2048	2048	8192	8192
ESP029	0.25	S	1	1	1	256	256	256	256	4	4	4	1024	1024	1024	1024
ESP031	0.125	S	1	4	256	256	1024	1024	1024	8	32	2048	2048	8192	8192	8192
ESP032	0.25	S	1	#N/A	#N/A	#N/A	#N/A	#N/A	>1024	4	#N/A	#N/A	#N/A	#N/A	#N/A	>4096
ESP033	0.125	S	1	1	1	4	256	256	256	8	8	8	32	2048	2048	2048
ESP034	0.125	S	1	1	256	256	256	256	256	8	8	2048	2048	2048	2048	2048
ESP035	0.125	S	1	1	1	1	4	4	16	8	8	8	8	32	32	128
ESP036	0.125	S	1	1	1	16	256	256	256	8	8	8	128	2048	2048	2048
ESP037	1	I	1	1	1	4	4	4	4	1	1	1	4	4	4	4
ESP038	0.5	S	1	1	1	1	256	256	256	2	2	2	2	512	512	512
ESP039	2	R	1	256	256	1024	1024	1024	1024	0.5	128	128	512	512	512	512
ESP040	64	R	1	1024	1024	1024	1024	1024	1024	0.015625	16	16	16	16	16	16
ESP044	0.5	S	1	4	4	256	256	256	256	2	8	8	512	512	512	512
ESP046	0.125	S	1	1	1	16	256	256	256	8	8	8	128	2048	2048	2048
ESP050	8	R	16	256	1024	1024	1024	1024	1024	2	32	128	128	128	128	128
ESP054	1	I	4	4	4	256	256	>1024	>1024	4	4	4	256	256	>1024	>1024
ESP055	0.5	S	1	1	256	256	256	256	256	2	2	512	512	512	512	512
ESP057	2	R	4	64	256	256	256	>1024	>1024	2	32	128	128	128	>512	>512
ESP058	0.25	S	1	1	4	16	256	256	256	4	4	16	64	1024	1024	1024
ESP059	8	R	16	16	256	1024	1024	1024	1024	2	2	32	128	128	128	128
ESP060	0.0625	S	1	256	256	256	256	256	256	16	4096	4096	4096	4096	4096	4096
ESP063	256	R	16	256	256	256	1024	1024	1024	0.0625	1	1	1	4	4	4
ESP066	32	R	256	256	1024	>1024	>1024	>1024	>1024	8	8	32	>32	>32	>32	>32
ESP067	0.25	S	1	16	1024	1024	1024	1024	1024	4	64	4096	4096	4096	4096	4096
ESP070	16	R	4	256	256	1024	1024	>1024	>1024	0.25	16	16	64	64	>64	>64
ESP072	0.5	S	1	1	1	64	64	1024	1024	2	2	2	128	128	2048	2048
ESP073	32	R	16	16	64	256	1024	>1024	>1024	0.5	0.5	2	8	32	>32	>32
ESP075	4	R	4	4	256	1024	1024	1024	1024	1	1	64	256	256	256	256
ESP076	0.5	S	256	256	1024	1024	>1024	>1024	>1024	512	512	2048	2048	>2048	>2048	>2048
ESP077	0.5	S	1	1	1	4	256	256	256	2	2	2	8	512	512	512
ESP081	2	R	1	4	4	256	1024	1024	1024	0.5	2	2	128	512	512	512
ESP083	256	R	64	256	1024	1024	1024	1024	1024	0.25	1	4	4	4	4	4
ESP088	256	R	64	256	256	256	1024	1024	>1024	0.25	1	1	1	4	4	>4
ESP091	16	R	16	256	1024	1024	>1024	>1024	>1024	1	16	64	64	>64	>64	>64
ESP093	64	R	1	256	256	256	1024	1024	1024	0.015625	4	4	4	16	16	16
F1659	32	R	64	256	1024	1024	>1024	>1024	>1024	2	8	32	32	>32	>32	>32
F1688	32	R	64	256	256	256	1024	1024	1024	2	8	8	8	32	32	32
F1689	16	R	16	64	64	256	256	1024	>1024	1	4	4	16	16	64	>64
F1706	2	R	16	16	256	1024	1024	1024	1024	8	8	128	512	512	512	512
F1720	2	R	1	256	1024	1024	1024	>1024	>1024	0.5	128	512	512	512	>512	>512
F1727	1	I	1	1	64	256	256	1024	1024	1	1	64	256	256	1024	1024
F1748	4	R	1	4	64	256	1024	>1024	>1024	0.25	1	16	64	256	>256	>256
F1757	1	I	64	64	256	1024	1024	>1024	>1024	64	64	256	1024	1024	>1024	>1024
F1758	0.25	S	1	1	256	256	1024	1024	1024	4	4	1024	1024	4096	4096	4096
F1759	64	R	16	256	1024	1024	>1024	>1024	>1024	0.25	4	16	16	>16	>16	>16
F1764	2	R	4	256	1024	>1024	>1024	>1024	>1024	2	128	512	>512	>512	>512	>512
F1775	16	R	64	256	1024	>1024	>1024	>1024	>1024	4	16	64	>64	>64	>64	>64
F1800	0.5	S	1	1	4	256	1024	1024	1024	2	2	8	512	2048	2048	2048
F1801	16	R	64	256	256	>1024	>1024	>1024	>1024	4	16	16	>64	>64	>64	>64
F1823	2	R	4	>1024	>1024	>1024	>1024	>1024	>1024	2	>512	>512	>512	>512	>512	>512
F1856	8	R	1	4	64	256	1024	>1024	>1024	0.125	0.5	8	32	128	>128	>128
F1862	2	R	4	64	256	256	1024	1024	1024	2	32	128	128	512	512	512
F1864	32	R	64	256	1024	1024	>1024	>1024	>1024	2	8	32	32	>32	>32	>32
F1880	2	R	4	256	256	256	1024	1024	>1024	2	128	128	128	512	512	>512
F1883	4	R	1	256	#N/A	#N/A	>1024	>1024	>1024	0.25	64	#N/A	#N/A	>256	>256	>256
F1894	2	R	4	4	64	1024	1024	1024	>1024	2	2	32	512	512	512	>512
F1957	64	R	256	1024	1024	1024	>1024	>1024	>1024	4	16	16	16	>16	>16	>16
F1959	32	R	256	256	1024	1024	>1024	>1024	>1024	8	8	32	32	>32	>32	>32
F1968	8	R	4	64	256	1024	1024	1024	1024	0.5	8	32	128	128	128	128
F1997	4	R	64	256	1024	1024	1024	>1024	>1024	16	64	256	256	256	>256	>256
F2003	64	R	256	256	256	256	1024	1024	1024	4	4	4	4	16	16	16
F2005	8	R	4	256	256	1024	1024	1024	1024	0.5	32	32	128	128	128	128
F2006	4	R	16	256	256	256	1024	>1024	>1024	4	64	64	64	256	>256	>256
F2010	16	R	16	64	256	1024	1024	1024	1024	1	4	16	64	64	64	64
F2017	32	R	16	256	256	1024	1024	>1024	>1024	0.5	8	8	32	32	>32	>32
F2020	16	R	16	256	1024	1024	1024	>1024	>1024	1	16	64	64	64	>64	>64
F2026	0.125	S	1	1	256	256	1024	1024	1024	8	8	2048	2048	8192	8192	8192
F2029	1	I	4	4	256	1024	1024	1024	1024	4	4	256	1024	1024	1024	1024
F2030	16	R	16	64	256	256	1024	1024	>1024	1	4	16	16	64	64	>64
F2034	64	R	256	256	>1024	>1024	>1024	>1024	>1024	4	4	>16	>16	>16	>16	>16
F2035	2	R	4	256	256	>1024	>1024	>1024	>1024	2	128	128	>512	>512	>512	>512
F2044	2	R	1	1	1	64	64	256	1024	0.5	0.5	0.5	32	32	128	512
F2045	4	R	4	1024	1024	1024	1024	>1024	>1024	1	256	256	256	256	>256	>256
F2055	8	R	64	256	1024	>1024	>1024	>1024	>1024	8	32	128	>128	>128	>128	>128
F2059	32	R	256	256	1024	>1024	>1024	>1024	>1024	8	8	32	>32	>32	>32	>32
F2065	2	R	4	256	256	256	256	1024	1024	2	128	128	128	128	512	512
F2075	4	R	1024	1024	1024	1024	1024	>1024	>1024	256	256	256	256	256	>256	>256
F2081	2	R	4	256	1024	1024	#N/A	#N/A	#N/A	2	128	512	512	#N/A	#N/A	#N/A
F2084	1	I	64	1024	1024	1024	>1024	>1024	>1024	64	1024	1024	1024	>1024	>1024	>1024
F2093	2	R	4	4	256	256	1024	>1024	>1024	2	2	128	128	512	>512	>512
F2119	64	R	256	256	1024	1024	>1024	>1024	>1024	4	4	16	16	>16	>16	>16
F2128	2	R	4	1024	1024	>1024	>1024	>1024	>1024	2	512	512	>512	>512	>512	>512
F2137	32	R	16	64	256	>1024	>1024	>1024	>1024	0.5	2	8	>32	>32	>32	>32
F2148	32	R	1024	1024	>1024	>1024	>1024	>1024	>1024	32	32	>32	>32	>32	>32	>32
F2160	2	R	1	1	4	256	1024	1024	1024	0.5	0.5	2	128	512	512	512
F2165	64	R	16	64	64	256	256	1024	>1024	0.25	1	1	4	4	16	>16
F2166	64	R	64	64	64	256	>1024	>1024	>1024	1	1	1	4	>16	>16	>16
F2172	2	R	1	256	256	1024	1024	1024	1024	0.5	128	128	512	512	512	512
F2205	1	I	4	64	256	1024	>1024	>1024	>1024	4	64	256	1024	>1024	>1024	>1024
F2224	128	R	64	64	64	256	256	256	1024	0.5	0.5	0.5	2	2	2	8
F2229	4	R	4	64	256	1024	>1024	>1024	>1024	1	16	64	256	>256	>256	>256
F2230	4	R	4	16	1024	1024	1024	1024	1024	1	4	256	256	256	256	256
F2234	64	R	16	256	1024	1024	>1024	>1024	>1024	0.25	4	16	16	>16	>16	>16
F2235	32	R	256	256	256	1024	1024	1024	1024	8	8	8	32	32	32	32
F2236	0.25	S	1	1	1	1	256	256	1024	4	4	4	4	1024	1024	4096
F2394	16	R	16	64	1024	1024	1024	>1024	>1024	1	4	64	64	64	>64	>64
F2805	16	R	16	256	256	256	256	1024	>1024	1	16	16	16	16	64	>64
F2856	32	R	4	64	256	256	1024	1024	1024	0.125	2	8	8	32	32	32
F2942	64	R	64	256	256	1024	1024	1024	1024	1	4	4	16	16	16	16
M70563004	0.5	S	1	1	1	16	256	1024	1024	2	2	2	32	512	2048	2048
M70564993	1	I	1	4	1024	1024	1024	1024	1024	1	4	1024	1024	1024	1024	1024
M70565254	0.5	S	1	1	1	4	1024	1024	1024	2	2	2	8	2048	2048	2048
M70565897	2	R	4	4	4	1024	1024	1024	1024	2	2	2	512	512	512	512
M70604538	128	R	256	1024	1024	>1024	>1024	>1024	>1024	2	8	8	>8	>8	>8	>8
M70608424	128	R	1024	1024	>1024	>1024	>1024	>1024	>1024	8	8	>8	>8	>8	>8	>8
M70639645	1	I	1	1	256	1024	1024	1024	1024	1	1	256	1024	1024	1024	1024
M70640096	0.25	S	1	1	4	16	64	256	256	4	4	16	64	256	1024	1024
M70641593	0.0625	S	1	1	#N/A	#N/A	256	1024	1024	16	16	#N/A	#N/A	4096	16384	16384
M70646050	1	I	1	1	1	1	1	256	256	1	1	1	1	1	256	256
M70646077	0.125	S	1	1	1	256	1024	1024	1024	8	8	8	2048	8192	8192	8192
M70647319	1	I	1	4	1	256	1024	>1024	>1024	1	4	1	256	1024	>1024	>1024
M70649365	32	R	16	16	256	256	256	>1024	>1024	0.5	0.5	8	8	8	>32	>32
M70652746	0.25	S	1	4	4	256	256	256	256	4	16	16	1024	1024	1024	1024
M70656672	0.5	S	1	1	1	4	256	256	256	2	2	2	8	512	512	512
M70663247	0.25	S	1	1	1	1	1	64	64	4	4	4	4	4	256	256
MD10010	0.5	S	1	256	256	256	256	256	256	2	512	512	512	512	512	512
MD1037	0.125	S	1	4	1	256	256	256	256	8	32	8	2048	2048	2048	2048
MD1496	0.125	S	1	1	16	256	256	256	256	8	8	128	2048	2048	2048	2048
MD1498	0.125	S	1	1	1	1	4	4	16	8	8	8	8	32	32	128
MD3496	0.125	S	1	256	256	256	256	256	256	8	2048	2048	2048	2048	2048	2048
MD4301	0.5	S	1	1	256	256	256	256	256	2	2	512	512	512	512	512
MD6136	0.25	S	1	1	256	256	256	256	256	4	4	1024	1024	1024	1024	1024
MD6439	0.25	S	1	1	1	256	256	1024	1024	4	4	4	1024	1024	4096	4096
MD8034	0.125	S	1	1	1	1	256	256	256	8	8	8	8	2048	2048	2048
MD8386	0.25	S	4	64	256	256	1024	1024	1024	16	256	1024	1024	4096	4096	4096
MD8672	0.125	S	1	1	1	1	4	256	256	8	8	8	8	32	2048	2048
MD9120	0.125	S	1	1	1	1	4	256	256	8	8	8	8	32	2048	2048
MD9121	0.125	S	1	1	1	1	16	1024	1024	8	8	8	8	128	8192	8192
MD9481	0.125	S	1	1	1	1	1	1	4	8	8	8	8	8	8	32
MD9723	0.25	S	1	1	1	256	256	1024	1024	4	4	4	1024	1024	4096	4096
MD9965_1	0.125	S	1	1	1	1	16	16	16	8	8	8	8	128	128	128
MD9965_2	0.5	S	1	1	1	1	4	256	256	2	2	2	2	8	512	512
MHH0147	0.5	S	4	16	256	1024	1024	>1024	>1024	8	32	512	2048	2048	>2048	>2048
MHH0426	2	R	16	1024	1024	1024	>1024	>1024	>1024	8	512	512	512	>512	>512	>512
MHH0927	0.5	S	1	4	4	4	16	256	256	2	8	8	8	32	512	512
MHH0985	2	R	16	256	1024	1024	1024	1024	1024	8	128	512	512	512	512	512
MHH14911	0.0625	S	1	1	1	256	256	256	256	16	16	16	4096	4096	4096	4096
MHH14929	2	R	1	4	64	64	>1024	>1024	>1024	0.5	2	32	32	>512	>512	>512
MHH14990	1	I	4	256	>1024	>1024	>1024	>1024	>1024	4	256	>1024	>1024	>1024	>1024	>1024
MHH15015	0.25	S	4	256	256	1024	1024	1024	1024	16	1024	1024	4096	4096	4096	4096
MHH15103	2	R	1	4	4	1024	1024	>1024	>1024	0.5	2	2	512	512	>512	>512
MHH15151	0.5	S	1	1	1	1	1024	1024	1024	2	2	2	2	2048	2048	2048
MHH15187	0.125	S	1	1	256	256	1024	1024	1024	8	8	2048	2048	8192	8192	8192
MHH15204	2	R	4	256	1024	1024	>1024	>1024	>1024	2	128	512	512	>512	>512	>512
MHH15275	8	R	16	256	>1024	>1024	>1024	>1024	>1024	2	32	>128	>128	>128	>128	>128
MHH15280	0.125	S	1	1	64	256	256	256	256	8	8	512	2048	2048	2048	2048
MHH15286	0.5	S	1	1	1	1	256	256	256	2	2	2	2	512	512	512
MHH15817	2	R	1	4	256	256	256	1024	1024	0.5	2	128	128	128	512	512
MHH16050	1	I	1	256	256	256	1024	1024	1024	1	256	256	256	1024	1024	1024
MHH16208	2	R	1	1	1	256	256	1024	1024	0.5	0.5	0.5	128	128	512	512
MHH16371	4	R	1	256	256	256	1024	1024	1024	0.25	64	64	64	256	256	256
MHH16379	0.5	S	1	4	256	1024	1024	1024	1024	2	8	512	2048	2048	2048	2048
MHH16427	2	R	1	4	4	256	256	1024	1024	0.5	2	2	128	128	512	512
MHH16459	0.5	S	1	256	256	256	256	1024	1024	2	512	512	512	512	2048	2048
MHH16513	4	R	4	256	256	1024	1024	>1024	>1024	1	64	64	256	256	>256	>256
MHH16530	1	I	1	256	256	256	1024	1024	1024	1	128	256	256	1024	1024	1024
MHH16563	1	I	1	4	64	256	1024	>1024	>1024	1	4	64	256	1024	>1024	>1024
MHH16610	4	R	64	256	1024	1024	1024	1024	1024	16	64	256	256	256	256	256
MHH16727	0.125	S	1	1	1	4	256	256	256	8	8	8	32	2048	2048	2048
MHH16798	4	R	4	256	1024	>1024	>1024	>1024	>1024	1	64	256	>256	>256	>256	>256
MHH16951	4	R	1	16	256	1024	1024	>1024	>1024	0.25	4	64	256	256	>256	>256
MHH17247	0.5	S	1	1	1	1	4	4	256	2	2	2	2	8	8	512
MHH17501	2	R	4	4	4	256	256	1024	1024	2	2	2	128	128	512	512
MHH17546	4	R	16	256	1024	>1024	>1024	>1024	>1024	4	64	256	>256	>256	>256	>256
MHH17634	1	I	16	64	256	1024	1024	1024	1024	16	64	256	1024	1024	1024	1024
MHH17704	0.25	S	1	1	1	1	1	256	256	4	4	4	4	4	1024	1024
MHH17767	0.5	S	1	4	64	256	1024	1024	1024	2	8	128	512	2048	2048	2048
MHH17783	0.125	S	1	4	256	256	256	256	256	8	32	2048	2048	2048	2048	2048
MHH1883	0.125	S	1	1	1	4	256	256	256	8	8	8	32	2048	2048	2048
MHH2419	1	I	4	256	1024	1024	1024	>1024	>1024	4	256	1024	1024	1024	>1024	>1024
MS1	0.0625	S	1	1	256	256	1024	1024	1024	16	16	4096	4096	16384	16384	16384
MS2	0.25	S	1	1	256	256	256	256	1024	4	4	1024	1024	1024	1024	4096
MS5	0.125	S	64	64	256	1024	>1024	>1024	>1024	512	512	2048	8192	>8192	>8192	>8192
PSAE1401	1	I	4	4	64	256	256	1024	1024	4	4	64	256	256	1024	1024
PSAE1438	4	R	4	4	1024	1024	1024	>1024	>1024	1	1	256	256	256	>256	>256
PSAE1439	4	R	4	256	256	1024	1024	1024	1024	1	64	64	256	256	256	256
PSAE1630	2	R	4	16	256	256	1024	1024	1024	2	8	128	128	512	512	512
PSAE1635	2	R	4	4	4	256	256	256	1024	2	2	2	128	128	128	512
PSAE1641	16	R	16	16	64	64	64	64	64	1	1	4	4	4	4	4
PSAE1642	1	I	1	1	64	256	256	256	1024	1	1	64	256	256	256	1024
PSAE1645	2	R	1	1	256	1024	1024	1024	1024	0.5	0.5	128	512	512	512	512
PSAE1647	2	R	4	4	4	64	256	256	1024	2	2	2	32	128	128	512
PSAE1649	0.5	S	4	4	4	64	256	256	256	8	8	8	128	512	512	512
PSAE1651	2	R	1	4	256	1024	1024	1024	1024	0.5	2	128	512	512	512	512
PSAE1654	2	R	1	1	1	4	1024	1024	1024	0.5	0.5	0.5	2	512	512	512
Psae1656	0.25	S	1	4	4	256	256	256	256	4	16	16	1024	1024	1024	1024
Psae1742	32	R	16	16	256	1024	1024	1024	1024	0.5	0.5	8	32	32	32	32
PSAE1745	4	R	16	64	64	256	256	256	256	4	16	16	64	64	64	64
PSAE1837	0.125	S	1	1	1	256	1024	1024	1024	8	8	8	2048	8192	8192	8192
PSAE1872	0.25	S	1	1	1	1	256	256	256	4	4	4	4	1024	1024	1024
PSAE1903	4	R	4	16	256	1024	1024	1024	1024	1	4	64	256	256	256	256
PSAE1934	0.5	S	1	1	1	4	4	256	256	2	2	2	8	8	512	512
Psae1970	2	R	4	4	256	1024	>1024	>1024	>1024	2	2	128	512	>512	>512	>512
PSAE1975	0.5	S	1	4	64	64	1024	1024	1024	2	8	128	128	2048	2048	2048
PSAE1984	0.25	S	1	1	1	16	256	256	256	4	4	4	64	1024	1024	1024
PSAE2125	0.0625	S	1	64	256	256	256	256	256	16	1024	4096	4096	4096	4096	4096
PSAE2126	0.25	S	1	1	256	256	1024	1024	1024	4	4	1024	1024	4096	4096	4096
PSAE2325	0.5	S	1	1	1	1	1	256	256	2	2	2	2	2	512	512
Vb3320	1	I	1	1	4	4	256	1024	>1024	1	1	4	4	256	1024	>1024
ZG02488718	0.25	S	1	1	256	256	256	256	256	4	4	1024	1024	1024	1024	1024
ZG02512057	0.25	S	1	1	1	256	1024	1024	1024	4	4	4	1024	4096	4096	4096
ZG205565	2	R	4	256	1024	1024	1024	1024	1024	2	128	512	512	512	512	512
ZG205694	0.5	S	4	4	256	256	256	256	256	8	8	512	512	512	512	512
ZG205710	1	I	1	1	1	4	64	64	64	1	1	1	4	64	64	64
ZG301975	0.5	S	1	1	16	64	256	1024	1024	2	2	32	128	512	2048	2048
ZG302359	0.0625	S	1	1	4	256	1024	1024	1024	16	16	64	4096	16384	16384	16384
ZG302367	0.125	S	1	256	256	256	256	256	256	8	2048	2048	2048	2048	2048	2048
ZG302368	0.0625	S	1	1	1	#N/A	256	256	256	16	16	16	#N/A	4096	4096	4096
ZG302370	32	R	16	256	1024	1024	1024	>1024	>1024	0.5	8	32	32	32	>32	>32
ZG302383	0.5	S	1	4	1	256	256	1024	1024	2	8	2	512	512	2048	2048
ZG302431	0.125	S	4	4	256	256	256	256	256	32	32	2048	2048	2048	2048	2048
ZG302432	0.125	S	1	1	1	1	4	256	256	8	8	8	8	32	2048	2048
ZG302442	0.125	S	64	64	64	64	64	256	256	512	512	512	512	512	2048	2048
ZG302451	0.125	S	1	1	1	16	256	256	256	8	8	8	128	2048	2048	2048
ZG314696	0.125	S	1	1	1	1	256	256	256	8	8	8	8	2048	2048	2048
ZG314738	0.5	S	1	1	1	256	256	256	256	2	2	2	512	512	512	512
ZG314777	0.125	S	1	1	1	4	256	256	256	8	8	8	32	2048	2048	2048
ZG316694	0.25	S	1	1	1	1	1	256	256	4	4	4	4	4	1024	1024
ZG316704	0.125	S	1	1	1	16	1024	1024	1024	8	8	8	128	8192	8192	8192
ZG316716	0.125	S	1	1	1	1	1	1	256	8	8	8	8	8	8	2048
ZG316717	16	R	16	64	1024	1024	1024	1024	>1024	1	4	64	64	64	64	>64
ZG316722	0.125	S	1	1	1	256	256	1024	1024	8	8	8	2048	2048	8192	8192
ZG5003493	0.5	S	1	1	1	256	256	1024	1024	2	2	2	512	512	2048	2048
ZG8038581181	8	R	64	64	256	256	1024	1024	1024	8	8	32	32	128	128	128
ZG8510487	32	R	4	256	1024	1024	1024	>1024	>1024	0.125	8	32	32	32	>32	>32

## Sheet: COL
	Colistin		Minimum antibiotic concentration of killing (MCK)							Biofilm tolerance factor (BTF)
			MCK90	MCK99	MCK99.9	MCK99.99	MCK99.999	MCK99.9999	MCK-E	BTF-1	BTF-2	BTF-3	BTF-4	BTF-5	BTF-6	BTF-E
isolate	MIC	CLSI	-1 log	-2 log	-3 log	-4 log	-5 log	-6 log	eradication	-1 log	-2 log	-3 log	-4 log	-5 log	-6 log	eradication
CF577_Iso7	0.5	S	1	64	64	64	64	64	64	2	128	128	128	128	128	128
CF590_Iso5	32	R	16	64	1024	1024	1024	1024	1024	0.5	2	32	32	32	32	32
CF592_Iso2	1	S	64	256	256	256	256	256	256	64	256	256	256	256	256	256
CF609_Iso3	0.5	S	16	64	64	64	64	64	64	32	128	128	128	128	128	128
CF609_Iso4	0.5	S	16	16	64	64	64	64	64	32	32	128	128	128	128	128
CH2500	1	S	64	256	256	256	256	256	256	64	256	256	256	256	256	256
CH2502	2	S	16	64	256	256	256	256	256	8	32	128	128	128	128	128
CH2522	4	R	64	64	256	256	256	256	256	16	16	64	64	64	64	64
CH2527	2	S	256	256	256	256	256	256	256	128	128	128	128	128	128	128
CH2582	2	S	1	256	256	256	1024	1024	1024	0.5	128	128	128	512	512	512
CH2597	2	S	256	256	256	256	256	256	256	128	128	128	128	128	128	128
CH2598	2	S	256	256	256	256	256	256	256	128	128	128	128	128	128	128
CH2658	2	S	64	256	256	256	256	256	256	32	128	128	128	128	128	128
CH2660	2	S	64	256	256	256	256	256	256	32	128	128	128	128	128	128
CH2672	2	S	256	256	256	256	256	256	256	128	128	128	128	128	128	128
CH2677	2	S	64	64	256	256	256	256	256	32	32	128	128	128	128	128
CH2678	4	R	256	256	256	256	256	256	256	64	64	64	64	64	64	64
CH2682	2	S	64	256	1024	1024	1024	1024	1024	32	128	512	512	512	512	512
CH2685	2	S	256	256	256	256	256	256	256	128	128	128	128	128	128	128
CH2687	2	S	256	256	256	256	256	256	256	128	128	128	128	128	128	128
CH2690	2	S	256	256	256	256	256	256	1024	128	128	128	128	128	128	512
CH2698	2	S	16	256	256	256	256	256	256	8	128	128	128	128	128	128
CH2706	2	S	64	256	256	256	256	256	256	32	128	128	128	128	128	128
CH2707	2	S	64	256	256	256	256	256	256	32	128	128	128	128	128	128
CH2713	2	S	256	256	256	256	256	256	256	128	128	128	128	128	128	128
CH2718	4	R	64	64	256	256	256	256	256	16	16	64	64	64	64	64
CH2724	2	S	64	64	256	256	256	256	256	32	32	128	128	128	128	128
CH2730	2	S	256	256	256	256	256	256	256	128	128	128	128	128	128	128
CH2734	1	S	64	256	256	256	256	256	256	64	256	256	256	256	256	256
CH2735	2	S	64	64	256	256	256	256	256	32	32	128	128	128	128	128
CH2747	2	S	64	64	256	256	256	256	256	32	32	128	128	128	128	128
CH2756	4	R	256	256	256	256	256	256	256	64	64	64	64	64	64	64
CH2764	2	S	1	256	256	256	256	256	256	0.5	128	128	128	128	128	128
CH2824	2	S	64	64	256	256	256	256	256	32	32	128	128	128	128	128
CH2829	2	S	16	64	64	256	256	256	256	8	32	32	128	128	128	128
CH2848	2	S	64	256	256	256	256	256	256	32	128	128	128	128	128	128
CH2860	2	S	16	256	256	256	256	256	256	8	128	128	128	128	128	128
CH2875	2	S	16	256	256	256	256	256	256	8	128	128	128	128	128	128
CH2922	2	S	256	256	256	256	256	256	256	128	128	128	128	128	128	128
CH2939	2	S	64	256	256	256	256	256	256	32	128	128	128	128	128	128
CH3177	2	S	64	64	256	256	256	256	256	32	32	128	128	128	128	128
CH3290	4	R	64	256	256	256	256	256	256	16	64	64	64	64	64	64
CH3325	2	S	256	256	256	256	256	256	256	128	128	128	128	128	128	128
CH3466	4	R	256	256	256	256	256	256	256	64	64	64	64	64	64	64
CH3484	2	S	256	256	256	256	256	256	256	128	128	128	128	128	128	128
CH3549	2	S	64	256	256	256	256	256	256	32	128	128	128	128	128	128
CH3797	4	R	64	256	256	256	256	256	256	16	64	64	64	64	64	64
CH3882	2	S	16	256	256	256	256	256	256	8	128	128	128	128	128	128
CH3906	2	S	256	256	256	256	256	256	256	128	128	128	128	128	128	128
CH4083	1	S	256	256	256	256	256	256	256	256	256	256	256	256	256	256
CH4418	2	S	256	256	256	256	256	256	256	128	128	128	128	128	128	128
CH4438	2	S	256	256	256	256	256	256	256	128	128	128	128	128	128	128
CH4443	2	S	256	256	256	256	256	256	256	128	128	128	128	128	128	128
CH4446	2	S	64	64	256	256	256	256	256	32	32	128	128	128	128	128
CH4489	0.5	S	16	64	64	64	64	64	64	32	128	128	128	128	128	128
CH4509	4	R	256	256	256	256	256	256	256	64	64	64	64	64	64	64
CH4520	4	R	16	256	256	256	256	256	256	4	64	64	64	64	64	64
CH4528	2	S	256	256	256	256	256	256	256	128	128	128	128	128	128	128
CH4549	2	S	256	256	256	256	256	256	256	128	128	128	128	128	128	128
CH4584	2	S	256	256	256	256	256	256	256	128	128	128	128	128	128	128
CH4591	2	S	16	64	256	256	256	256	256	8	32	128	128	128	128	128
CH4602	2	S	64	256	256	256	256	256	256	32	128	128	128	128	128	128
CH4634	2	S	256	256	256	256	256	256	256	128	128	128	128	128	128	128
CH4684	1	S	64	64	256	256	256	256	256	64	64	256	256	256	256	256
CH4703	1	S	16	16	64	64	64	64	64	16	16	64	64	64	64	64
CH4755	2	S	256	256	256	256	256	256	256	128	128	128	128	128	128	128
CH4757	0.5	S	64	64	256	256	256	256	256	128	128	512	512	512	512	512
CH4766	2	S	256	256	256	256	256	256	256	128	128	128	128	128	128	128
CH4780	8	R	64	64	64	64	64	64	64	8	8	8	8	8	8	8
CH4785	2	S	256	256	256	256	256	256	256	128	128	128	128	128	128	128
CH4786	2	S	256	256	256	256	256	256	256	128	128	128	128	128	128	128
CH4840	2	S	64	256	256	256	256	256	256	32	128	128	128	128	128	128
CH4860	2	S	64	64	64	256	256	256	256	32	32	32	128	128	128	128
CH4878	2	S	64	256	256	256	256	256	256	32	128	128	128	128	128	128
CH4891	2	S	256	256	256	256	256	256	256	128	128	128	128	128	128	128
CH4914	8	R	4	64	64	64	64	64	256	0.5	8	8	8	8	8	32
CH4916	2	S	256	256	256	256	256	256	256	128	128	128	128	128	128	128
CH4990	2	S	256	256	256	256	256	256	256	128	128	128	128	128	128	128
CH4992	2	S	256	256	256	256	256	256	256	128	128	128	128	128	128	128
CH5052	2	S	64	256	256	256	256	256	256	32	128	128	128	128	128	128
CH5066	2	S	256	256	256	256	256	256	256	128	128	128	128	128	128	128
CH5182	1	S	256	256	256	256	256	256	256	256	256	256	256	256	256	256
CH5206	1	S	256	256	256	256	256	256	256	256	256	256	256	256	256	256
CH5262	2	S	64	64	256	256	256	256	256	32	32	128	128	128	128	128
CH5267	2	S	4	256	256	256	256	256	256	2	128	128	128	128	128	128
CH5291	2	S	256	256	256	256	#N/A	#N/A	#N/A	128	128	128	128	#N/A	#N/A	#N/A
CH5334	2	S	256	256	256	256	256	256	256	128	128	128	128	128	128	128
CH5353	1	S	256	256	256	256	256	#N/A	#N/A	256	256	256	256	256	#N/A	#N/A
CH5362	2	S	256	256	256	256	256	256	256	128	128	128	128	128	128	128
CH5363	4	R	256	256	256	256	256	256	256	64	64	64	64	64	64	64
CH5387	2	S	64	64	256	256	256	256	256	32	32	128	128	128	128	128
CH5432	2	S	64	64	64	256	256	256	1024	32	32	32	128	128	128	512
CH5462	2	S	256	256	256	256	256	256	256	128	128	128	128	128	128	128
CH5478	2	S	256	256	256	256	256	256	256	128	128	128	128	128	128	128
CH5528	2	S	64	64	64	64	64	256	256	32	32	32	32	32	128	128
CH5531	8	R	256	256	256	256	256	256	256	32	32	32	32	32	32	32
CH5548	4	R	256	256	256	256	256	256	256	64	64	64	64	64	64	64
CH5550	8	R	256	256	>1024	>1024	>1024	>1024	>1024	32	32	>128	>128	>128	>128	>128
CH5596	2	S	64	64	256	256	256	256	256	32	32	128	128	128	128	128
CH5597	1	S	64	64	64	64	64	64	64	64	64	64	64	64	64	64
CH5621	0.25	S	256	256	256	256	256	256	256	1024	1024	1024	1024	1024	1024	1024
CH5638	2	S	64	256	256	256	256	256	256	32	128	128	128	128	128	128
ESP001	2	S	64	64	256	256	256	256	256	32	32	128	128	128	128	128
ESP002	2	S	4	64	256	256	256	256	256	2	32	128	128	128	128	128
ESP003	2	S	256	256	256	256	256	256	256	128	128	128	128	128	128	128
ESP004	1	S	64	256	256	256	256	256	256	64	256	256	256	256	256	256
ESP006	2	S	64	64	64	64	256	256	256	32	32	32	32	128	128	128
ESP009	1	S	64	64	64	64	64	64	64	64	64	64	64	64	64	64
ESP011	2	S	16	16	64	64	64	64	64	8	8	32	32	32	32	32
ESP012	1	S	64	64	64	64	64	64	64	64	64	64	64	64	64	64
ESP013	1	S	64	64	256	256	1024	1024	1024	64	64	256	256	1024	1024	1024
ESP015	2	S	64	256	256	256	256	256	256	32	128	128	128	128	128	128
ESP020	1	S	64	256	256	256	256	256	256	64	256	256	256	256	256	256
ESP021	2	S	16	64	256	256	256	256	256	8	32	128	128	128	128	128
ESP022	2	S	256	256	256	256	256	256	256	128	128	128	128	128	128	128
ESP023	1	S	64	64	64	64	64	64	64	64	64	64	64	64	64	64
ESP024	2	S	4	4	256	256	256	256	256	2	2	128	128	128	128	128
ESP025	1	S	16	16	16	16	16	16	64	16	16	16	16	16	16	64
ESP027	1	S	16	64	64	64	64	64	64	16	64	64	64	64	64	64
ESP028	4	R	256	256	256	256	256	256	256	64	64	64	64	64	64	64
ESP029	2	S	256	256	256	256	256	256	256	128	128	128	128	128	128	128
ESP031	1	S	256	256	256	256	256	256	256	256	256	256	256	256	256	256
ESP032	2	S	256	256	256	256	256	256	256	128	128	128	128	128	128	128
ESP033	1	S	256	256	256	256	256	256	256	256	256	256	256	256	256	256
ESP034	2	S	256	256	256	256	256	256	256	128	128	128	128	128	128	128
ESP035	2	S	64	256	256	256	256	256	256	32	128	128	128	128	128	128
ESP036	2	S	256	256	256	256	256	256	256	128	128	128	128	128	128	128
ESP037	1	S	64	64	64	64	64	64	64	64	64	64	64	64	64	64
ESP038	2	S	64	64	64	256	256	256	256	32	32	32	128	128	128	128
ESP039	1	S	64	64	64	64	64	64	64	64	64	64	64	64	64	64
ESP040	8	R	64	64	64	64	64	64	64	8	8	8	8	8	8	8
ESP044	2	S	64	64	256	256	256	256	256	32	32	128	128	128	128	128
ESP046	2	S	256	256	256	256	256	256	256	128	128	128	128	128	128	128
ESP050	1	S	64	256	256	256	256	256	256	64	256	256	256	256	256	256
ESP054	2	S	64	256	256	256	256	256	256	32	128	128	128	128	128	128
ESP055	1	S	64	256	256	256	256	256	256	64	256	256	256	256	256	256
ESP057	1	S	256	256	256	256	256	256	256	256	256	256	256	256	256	256
ESP058	4	R	256	256	256	256	256	256	256	64	64	64	64	64	64	64
ESP059	2	S	64	256	256	256	256	256	256	32	128	128	128	128	128	128
ESP060	2	S	256	256	256	1024	1024	1024	1024	128	128	128	512	512	512	512
ESP063	2	S	1	16	64	256	256	256	256	0.5	8	32	128	128	128	128
ESP066	2	S	256	256	256	1024	1024	1024	1024	128	128	128	512	512	512	512
ESP067	2	S	64	256	256	256	256	256	256	32	128	128	128	128	128	128
ESP070	1	S	64	256	256	1024	1024	1024	1024	64	256	256	1024	1024	1024	1024
ESP072	2	S	64	256	256	256	256	256	256	32	128	128	128	128	128	128
ESP073	2	S	16	256	256	256	256	256	256	8	128	128	128	128	128	128
ESP075	2	S	256	256	256	256	256	256	256	128	128	128	128	128	128	128
ESP076	2	S	256	256	256	256	256	256	256	128	128	128	128	128	128	128
ESP077	2	S	64	64	256	256	256	256	256	32	32	128	128	128	128	128
ESP081	2	S	256	256	256	256	256	256	256	128	128	128	128	128	128	128
ESP083	2	S	4	64	256	256	256	256	256	2	32	128	128	128	128	128
ESP088	2	S	64	64	256	256	256	256	256	32	32	128	128	128	128	128
ESP091	2	S	256	256	256	256	256	256	256	128	128	128	128	128	128	128
ESP093	2	S	16	64	256	256	256	256	256	8	32	128	128	128	128	128
F1659	2	S	16	64	64	64	#N/A	#N/A	#N/A	8	32	32	32	#N/A	#N/A	#N/A
F1688	2	S	16	256	256	256	256	256	256	8	128	128	128	128	128	128
F1706	2	S	256	256	256	256	256	256	256	128	128	128	128	128	128	128
F1720	2	S	1	64	256	256	256	256	256	0.5	32	128	128	128	128	128
F1727	2	S	256	256	256	256	256	256	256	128	128	128	128	128	128	128
F1748	2	S	256	256	256	256	256	#N/A	#N/A	128	128	128	128	128	#N/A	#N/A
F1757	2	S	64	64	64	64	64	256	256	32	32	32	32	32	128	128
F1758	2	S	64	256	256	256	256	256	256	32	128	128	128	128	128	128
F1759	2	S	64	256	256	256	256	256	256	32	128	128	128	128	128	128
F1764	4	R	16	64	64	64	64	64	64	4	16	16	16	16	16	16
F1775	2	S	16	256	256	256	256	256	256	8	128	128	128	128	128	128
F1800	2	S	16	256	1024	1024	1024	1024	1024	8	128	512	512	512	512	512
F1801	2	S	256	256	256	256	#N/A	#N/A	#N/A	128	128	128	128	#N/A	#N/A	#N/A
F1823	2	S	64	256	256	256	256	1024	1024	32	128	128	128	128	512	512
F1856	2	S	4	16	64	64	64	64	64	2	8	32	32	32	32	32
F1862	2	S	256	256	256	256	256	256	256	128	128	128	128	128	128	128
F1864	2	S	256	256	256	256	1024	1024	1024	128	128	128	128	512	512	512
F1880	4	R	256	256	256	256	256	256	256	64	64	64	64	64	64	64
F1883	4	R	16	256	1024	1024	1024	1024	1024	4	64	256	256	256	256	256
F1894	2	S	256	256	256	256	256	256	256	128	128	128	128	128	128	128
F1957	2	S	256	256	256	256	256	1024	1024	128	128	128	128	128	512	512
F1959	4	R	64	64	64	64	64	64	64	16	16	16	16	16	16	16
F1968	4	R	64	256	256	256	256	256	256	16	64	64	64	64	64	64
F2003	0.5	S	64	256	256	1024	1024	1024	1024	128	512	512	2048	2048	2048	2048
F2005	2	S	16	256	256	256	256	256	256	8	128	128	128	128	128	128
F2006	4	R	64	64	256	256	256	256	256	16	16	64	64	64	64	64
F2010	4	R	64	256	256	256	1024	1024	1024	16	64	64	64	256	256	256
F2017	4	R	4	64	256	256	1024	>1024	>1024	1	16	64	64	256	>256	>256
F2020	1	S	16	64	64	64	64	64	256	16	64	64	64	64	64	256
F2026	2	S	256	256	256	256	256	256	256	128	128	128	128	128	128	128
F2029	2	S	256	256	256	256	256	256	256	128	128	128	128	128	128	128
F2030	4	R	64	256	256	256	256	256	256	16	64	64	64	64	64	64
F2034	8	R	64	64	256	256	256	256	256	8	8	32	32	32	32	32
F2035	8	R	64	64	256	256	256	1024	1024	8	8	32	32	32	128	128
F2044	4	R	64	256	256	256	256	256	256	16	64	64	64	64	64	64
F2045	32	R	256	>1024	>1024	>1024	>1024	>1024	>1024	8	>32	>32	>32	>32	>32	>32
F2059	4	R	256	256	256	256	256	256	256	64	64	64	64	64	64	64
F2065	4	R	256	256	256	256	256	#N/A	#N/A	64	64	64	64	64	#N/A	#N/A
F2075	4	R	64	256	256	256	256	256	256	16	64	64	64	64	64	64
F2081	4	R	256	256	1024	1024	1024	1024	1024	64	64	256	256	256	256	256
F2084	16	R	256	256	1024	1024	1024	>1024	>1024	16	16	64	64	64	>64	>64
F2093	4	R	64	256	256	256	256	256	256	16	64	64	64	64	64	64
F2119	16	R	16	64	1024	1024	1024	1024	1024	1	4	64	64	64	64	64
F2128	4	R	256	256	256	256	256	256	256	64	64	64	64	64	64	64
F2137	4	R	64	64	256	256	256	256	256	16	16	64	64	64	64	64
F2148	2	S	64	64	256	256	256	256	256	32	32	128	128	128	128	128
F2160	1	S	64	64	64	64	64	64	64	64	64	64	64	64	64	64
F2165	4	R	256	256	256	256	256	256	256	64	64	64	64	64	64	64
F2166	2	S	256	256	256	256	256	256	256	128	128	128	128	128	128	128
F2172	4	R	16	64	64	64	256	256	256	4	16	16	16	64	64	64
F2205	4	R	64	256	256	256	256	256	256	16	64	64	64	64	64	64
F2224	1	S	64	64	256	256	256	256	256	64	64	256	256	256	256	256
F2229	4	R	16	64	256	256	256	256	256	4	16	64	64	64	64	64
F2230	4	R	64	256	256	256	1024	1024	1024	16	64	64	64	256	256	256
F2234	2	S	64	256	256	256	256	256	256	32	128	128	128	128	128	128
F2235	2	S	256	256	256	256	256	256	256	128	128	128	128	128	128	128
F2236	4	R	64	256	256	256	256	256	256	16	64	64	64	64	64	64
F2394	2	S	1	64	64	256	256	256	256	0.5	32	32	128	128	128	128
F2805	1	S	64	256	256	256	256	256	256	64	256	256	256	256	256	256
F2856	2	S	16	64	256	256	256	256	256	8	32	128	128	128	128	128
F2942	2	S	256	256	256	256	256	256	256	128	128	128	128	128	128	128
M70563004	1	S	64	256	256	256	256	256	256	64	256	256	256	256	256	256
M70564993	2	S	256	256	256	256	256	256	256	128	128	128	128	128	128	128
M70565254	4	R	64	256	256	256	256	256	256	16	64	64	64	64	64	64
M70565897	2	S	256	256	256	256	256	256	256	128	128	128	128	128	128	128
M70604538	4	R	256	1024	1024	1024	1024	1024	1024	64	256	256	256	256	256	256
M70608424	4	R	64	256	1024	1024	1024	1024	1024	16	64	256	256	256	256	256
M70639645	2	S	64	256	256	256	#N/A	#N/A	#N/A	32	128	128	128	#N/A	#N/A	#N/A
M70640096	2	S	256	256	256	256	256	256	256	128	128	128	128	128	128	128
M70641593	2	S	256	256	256	256	256	256	256	128	128	128	128	128	128	128
M70646050	0.5	S	256	256	256	256	256	256	256	512	512	512	512	512	512	512
M70646077	4	R	16	16	256	1024	1024	1024	1024	4	4	64	256	256	256	256
M70647319	2	S	4	256	256	256	256	256	256	2	128	128	128	128	128	128
M70649365	4	R	256	256	256	256	256	256	256	64	64	64	64	64	64	64
M70652746	2	S	256	256	256	256	256	256	256	128	128	128	128	128	128	128
M70656672	0.5	S	64	256	256	256	256	256	256	128	512	512	512	512	512	512
M70663247	2	S	256	256	256	256	256	256	256	128	128	128	128	128	128	128
MD10010	2	S	64	64	256	256	256	256	256	32	32	128	128	128	128	128
MD1037	2	S	64	256	256	256	256	256	256	32	128	128	128	128	128	128
MD1496	2	S	64	256	256	256	256	256	256	32	128	128	128	128	128	128
MD1498	2	S	64	256	256	256	256	256	256	32	128	128	128	128	128	128
MD3496	2	S	64	256	256	256	256	256	256	32	128	128	128	128	128	128
MD4301	2	S	64	64	256	256	256	256	256	32	32	128	128	128	128	128
MD6136	2	S	256	256	256	256	256	256	256	128	128	128	128	128	128	128
MD6439	0.5	S	64	256	256	256	256	256	256	128	512	512	512	512	512	512
MD8034	2	S	64	64	256	256	256	256	256	32	32	128	128	128	128	128
MD8386	2	S	64	64	256	256	256	256	256	32	32	128	128	128	128	128
MD8672	2	S	256	256	256	256	256	256	256	128	128	128	128	128	128	128
MD9120	1	S	64	256	256	256	256	256	256	64	256	256	256	256	256	256
MD9121	2	S	256	256	256	256	256	256	256	128	128	128	128	128	128	128
MD9481	2	S	64	64	64	256	256	256	256	32	32	32	128	128	128	128
MD9723	2	S	64	64	64	256	256	256	256	32	32	32	128	128	128	128
MD9965_1	2	S	256	256	256	256	256	256	256	128	128	128	128	128	128	128
MD9965_2	4	R	64	64	256	256	256	256	256	16	16	64	64	64	64	64
MHH0147	2	S	16	16	16	16	64	64	64	8	8	8	8	32	32	32
MHH0426	1	S	16	16	64	64	64	64	64	16	16	64	64	64	64	64
MHH0927	4	R	4	64	64	64	64	64	64	1	16	16	16	16	16	16
MHH0985	1	S	16	16	16	16	64	64	64	16	16	16	16	64	64	64
MHH14911	4	R	256	256	256	256	256	256	256	64	64	64	64	64	64	64
MHH14929	2	S	256	256	256	256	256	256	256	128	128	128	128	128	128	128
MHH14990	2	S	256	256	256	256	256	256	256	128	128	128	128	128	128	128
MHH15015	0.5	S	64	64	64	64	256	256	256	128	128	128	128	512	512	512
MHH15103	2	S	1	256	256	256	256	256	256	0.5	128	128	128	128	128	128
MHH15151	2	S	256	256	256	256	256	256	256	128	128	128	128	128	128	128
MHH15187	2	S	1	64	256	256	256	256	256	0.5	32	128	128	128	128	128
MHH15204	2	S	1	16	64	64	64	64	64	0.5	8	32	32	32	32	32
MHH15275	2	S	256	256	256	256	256	256	256	128	128	128	128	128	128	128
MHH15280	1	S	256	256	256	256	256	256	256	256	256	256	256	256	256	256
MHH15286	2	S	64	64	256	256	256	256	256	32	32	128	128	128	128	128
MHH15817	2	S	1	256	256	256	256	256	256	0.5	128	128	128	128	128	128
MHH16050	0.25	S	64	64	64	64	64	64	64	256	256	256	256	256	256	256
MHH16208	2	S	256	256	256	256	256	256	256	128	128	128	128	128	128	128
MHH16371	1	S	64	64	256	256	256	256	256	64	64	256	256	256	256	256
MHH16379	2	S	64	256	256	256	256	256	256	32	128	128	128	128	128	128
MHH16427	2	S	256	256	256	256	256	256	256	128	128	128	128	128	128	128
MHH16459	2	S	256	256	256	256	256	256	256	128	128	128	128	128	128	128
MHH16513	2	S	16	256	256	256	256	256	256	8	128	128	128	128	128	128
MHH16530	1	S	64	256	256	256	256	256	256	64	256	256	256	256	256	256
MHH16563	1	S	16	64	64	64	64	64	64	16	64	64	64	64	64	64
MHH16610	2	S	64	256	256	256	256	256	256	32	128	128	128	128	128	128
MHH16727	2	S	256	256	256	256	256	256	256	128	128	128	128	128	128	128
MHH16798	2	S	64	64	256	256	256	256	256	32	32	128	128	128	128	128
MHH16951	1	S	16	16	16	64	64	64	64	16	16	16	64	64	64	64
MHH17247	2	S	256	256	256	256	256	256	256	128	128	128	128	128	128	128
MHH17501	1	S	256	256	256	256	256	256	256	256	256	256	256	256	256	256
MHH17546	1	S	16	64	64	64	64	64	64	16	64	64	64	64	64	64
MHH17704	4	R	256	256	256	256	256	256	256	64	64	64	64	64	64	64
MHH17767	0.5	S	64	256	256	256	256	256	256	128	512	512	512	512	512	512
MHH17783	2	S	64	64	64	64	64	64	64	32	32	32	32	32	32	32
MHH1883	2	S	64	64	64	64	64	64	64	32	32	32	32	32	32	32
MHH2419	1	S	256	256	256	256	256	256	256	256	256	256	256	256	256	256
MS1	2	S	256	256	256	256	256	256	256	128	128	128	128	128	128	128
MS2	2	S	64	64	64	64	64	64	64	32	32	32	32	32	32	32
MS5	2	S	16	256	256	256	256	256	256	8	128	128	128	128	128	128
PSAE1401	4	R	256	256	256	256	256	256	256	64	64	64	64	64	64	64
PSAE1438	8	R	64	256	256	256	256	256	256	8	32	32	32	32	32	32
PSAE1630	2	S	256	256	256	256	256	256	256	128	128	128	128	128	128	128
PSAE1635	1	S	256	256	256	256	256	256	256	256	256	256	256	256	256	256
PSAE1641	1	S	256	256	256	256	256	256	256	256	256	256	256	256	256	256
PSAE1642	2	S	256	256	256	256	256	256	256	128	128	128	128	128	128	128
PSAE1645	1	S	256	256	256	256	256	256	256	256	256	256	256	256	256	256
PSAE1647	1	S	64	64	256	256	256	256	256	64	64	256	256	256	256	256
PSAE1649	2	S	64	64	256	256	256	256	256	32	32	128	128	128	128	128
PSAE1651	1	S	64	256	256	1024	1024	1024	1024	64	256	256	1024	1024	1024	1024
PSAE1654	1	S	64	256	256	256	256	256	256	64	256	256	256	256	256	256
Psae1656	2	S	64	256	256	256	256	256	256	32	128	128	128	128	128	128
PSAE1745	2	S	64	256	256	256	256	256	256	32	128	128	128	128	128	128
PSAE1837	1	S	64	64	64	64	64	64	64	64	64	64	64	64	64	64
PSAE1872	2	S	16	64	256	256	256	256	256	8	32	128	128	128	128	128
PSAE1903	2	S	64	256	256	256	256	256	256	32	128	128	128	128	128	128
PSAE1934	2	S	64	64	256	256	256	256	256	32	32	128	128	128	128	128
PSAE1975	2	S	256	256	256	256	1024	1024	1024	128	128	128	128	512	512	512
PSAE1984	8	R	64	64	64	256	256	256	256	8	8	8	32	32	32	32
PSAE2125	2	S	64	64	64	64	64	64	256	32	32	32	32	32	32	128
PSAE2126	2	S	256	256	256	256	256	256	256	128	128	128	128	128	128	128
PSAE2325	2	S	256	256	256	256	256	256	256	128	128	128	128	128	128	128
Vb3320	2	S	16	256	256	256	256	256	256	8	128	128	128	128	128	128
ZG02488718	2	S	64	64	64	256	256	256	256	32	32	32	128	128	128	128
ZG02512057	0.5	S	64	64	64	64	64	64	64	128	128	128	128	128	128	128
ZG205565	2	S	64	64	256	256	256	1024	1024	32	32	128	128	128	512	512
ZG205694	2	S	256	256	256	256	256	256	256	128	128	128	128	128	128	128
ZG205710	0.5	S	256	256	256	256	256	256	256	512	512	512	512	512	512	512
ZG301975	2	S	64	64	256	256	256	256	256	32	32	128	128	128	128	128
ZG302359	1	S	256	256	256	256	256	256	256	256	256	256	256	256	256	256
ZG302367	4	R	256	256	256	256	256	256	256	64	64	64	64	64	64	64
ZG302368	2	S	64	256	256	256	256	256	256	32	128	128	128	128	128	128
ZG302370	2	S	64	256	256	256	256	1024	1024	32	128	128	128	128	512	512
ZG302383	2	S	64	256	256	256	256	1024	1024	32	128	128	128	128	512	512
ZG302431	4	R	256	256	256	256	256	256	256	64	64	64	64	64	64	64
ZG302432	2	S	64	64	64	256	256	256	256	32	32	32	128	128	128	128
ZG302442	2	S	64	256	256	256	256	256	256	32	128	128	128	128	128	128
ZG302451	2	S	64	256	256	256	256	256	256	32	128	128	128	128	128	128
ZG314696	2	S	64	64	64	256	256	256	256	32	32	32	128	128	128	128
ZG314738	1	S	256	256	256	256	256	256	256	256	256	256	256	256	256	256
ZG314777	1	S	64	64	64	256	256	256	256	64	64	64	256	256	256	256
ZG316694	1	S	256	256	256	256	256	256	256	256	256	256	256	256	256	256
ZG316704	2	S	256	256	256	256	256	256	256	128	128	128	128	128	128	128
ZG316716	1	S	64	64	256	256	256	256	256	64	64	256	256	256	256	256
ZG316717	2	S	16	64	256	256	1024	1024	1024	8	32	128	128	512	512	512
ZG316722	2	S	256	256	256	256	256	256	256	128	128	128	128	128	128	128
ZG5003493	2	S	16	64	256	256	256	256	256	8	32	128	128	128	128	128
ZG8038581181	1	S	64	256	256	256	256	256	256	64	256	256	256	256	256	256
ZG8510487	2	S	64	256	256	256	256	256	256	32	128	128	128	128	128	128
